# Supplementary material for: TNFα drives pulmonary arterial hypertension by suppressing the BMP type-II receptor and altering NOTCH signalling
Source: PubMed Central journal article supplement (PMC5241886; doi:10.1038/ncomms14079), 2017-01-13
Supplement: ncomms14079-s1.pdf [file ncomms14079-s1.pdf]

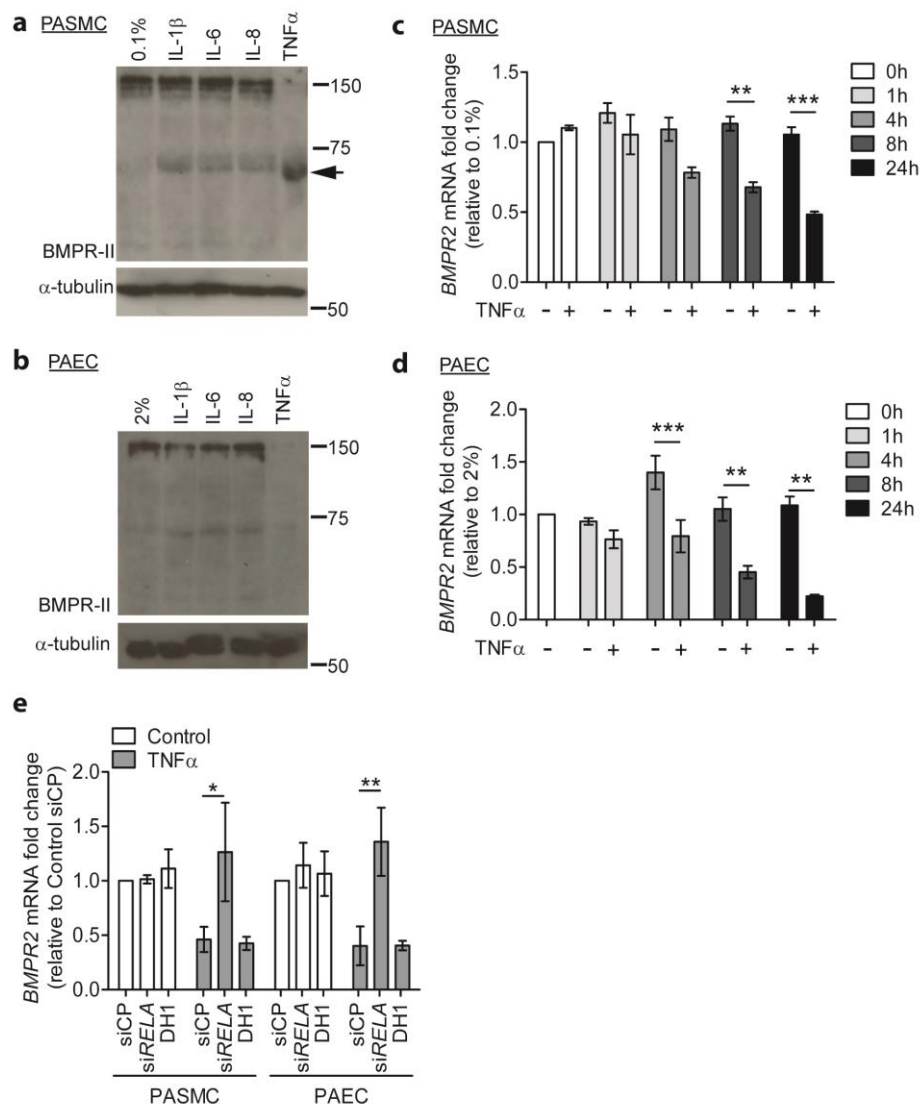

**Supplementary Figure 1. TNF $\alpha$  reduces BMPR-II protein and mRNA expression via NF- $\kappa$ B/RELA.** (a and b) Representative immunoblots of BMPR-II in human dPASCs (a) and PAECs (b) treated with IL-1 $\beta$  (1 ng mL $^{-1}$ ), IL-6 (25 ng mL $^{-1}$ ), IL-8 (25 ng mL $^{-1}$ ) and TNF $\alpha$  (1 ng mL $^{-1}$ ) for 24 h. Blots were reprobbed for  $\alpha$ -tubulin to ensure equal loading. The data shown are representative of three experiments. (c and d) *BMPR2* mRNA expression, normalized to *ACTB*, in (c) human dPASCs and (d) PAECs treated with TNF $\alpha$  (1 ng mL $^{-1}$ ) for 1, 4, 8 or 24 h ( $n = 3$ ; Student's *t*-test). (e) *BMPR2* mRNA expression, normalized to *ACTB*, in human control dPASCs and PAECs transfected with DharmaFECT1<sup>TM</sup> alone (DH1), siRELA or non-targeting siRNA control (siCP). Cells were treated with TNF $\alpha$  (1 ng mL $^{-1}$ ) for 24 h ( $n = 3$ ; Student's *t*-test). \* $P \leq 0.05$ , \*\* $P \leq 0.01$ , \*\*\* $P \leq 0.001$ . Error bars represent mean  $\pm$  s.e.m. Lower molecular mass BMPR-II is indicated by arrow.

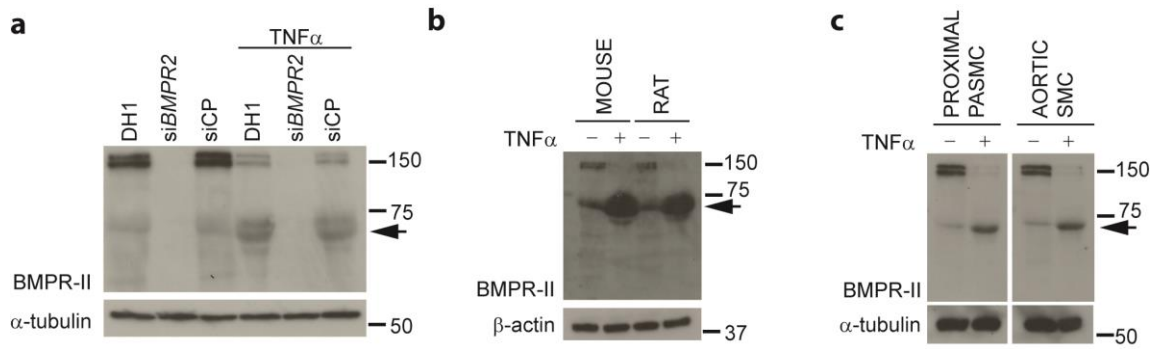

**Supplementary Figure 2. TNF $\alpha$  reduces BMPR-II protein and generates a cleavage product in SMCs.** (a) Representative immunoblots of BMPR-II in human control dPASCs transfected with DharmaFECT1<sup>TM</sup> alone (DH1), siBMPR2 or non-targeting siRNA control (siCP). Cells were treated with TNF $\alpha$  (1 ng mL<sup>-1</sup>) for 24 h. Blots were re-probed for  $\alpha$ -tubulin to ensure equal loading. The data shown are representative of three experiments. (b) Representative immunoblots of BMPR-II in mouse and rat PASCs treated with TNF $\alpha$  (1 ng mL<sup>-1</sup>) for 24 h. Re-probed for  $\beta$ -actin to ensure equal loading. The data shown are representative of three experiments. (c) Representative immunoblots of BMPR-II in human control proximal and aortic PASCs treated with TNF $\alpha$  (1 ng mL<sup>-1</sup>) for 24 h. Blots were re-probed for  $\alpha$ -tubulin to ensure equal loading. The data shown are representative of three experiments. Lower molecular mass BMPR-II is indicated by an arrow.

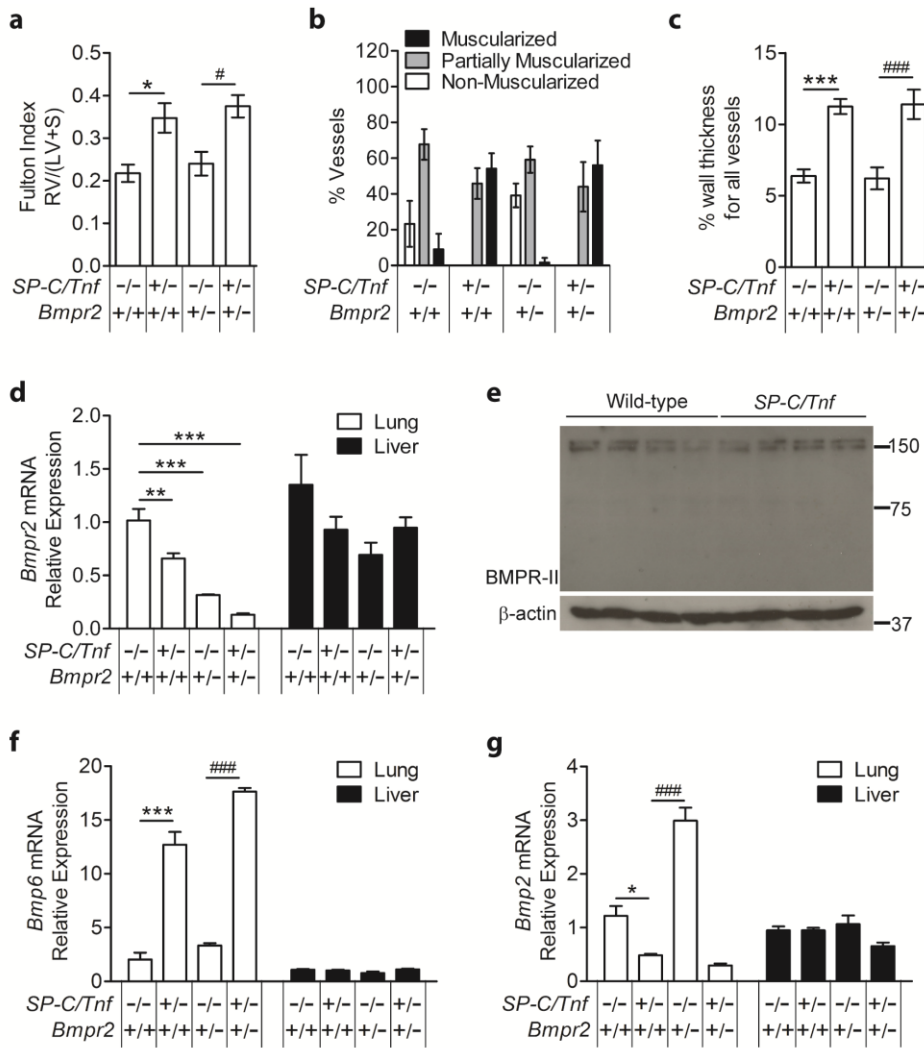

**Supplementary Figure 3. Lung specific expression of TNF $\alpha$  induces pulmonary hypertension.** *Bmpr2*<sup>+/+</sup>, *SP-C/Tnf*  $\times$  *Bmpr2*<sup>+/+</sup>, *Bmpr2*<sup>+/-</sup> and *SP-C/Tnf*  $\times$  *Bmpr2*<sup>+/-</sup> ( $n = 4$  of each) transgenic mice were assessed at 8-9 weeks old. (a) Assessment of right ventricular hypertrophy (Fulton index (RV/LV+S)). (b) Quantification of the numbers of non-, partially and fully muscularized arteries as a percentage of total alveolar wall and duct arteries ( $n = 6$  for all groups). (c) Assessment of pulmonary arterial wall thickness as a percentage of luminal diameter ( $n = 6$  for all groups). (d) *Bmpr2* mRNA expression, normalized to *Actb*, in lungs and livers isolated from the above mice. (e) Representative immunoblot of BMPR-II expression in livers isolated from 8-9 week old *Bmpr2*<sup>+/+</sup> and *SP-C/Tnf*  $\times$  *Bmpr2*<sup>+/-</sup> transgenic mice. Blots were reprobbed for  $\beta$ -actin to ensure equal loading ( $n = 4$ ). (f) *Bmp6* and (g) *Bmp2* mRNA expression, normalized to *Actb*, in lungs and livers isolated from the above mice. One-way ANOVA with post-hoc Tukey's for multiple comparisons used in a, c, d, f and g. \*/# $P \leq 0.05$ , \*\* $P \leq 0.01$ , \*\*\*/### $P \leq 0.001$ . Error bars represent mean  $\pm$  s.e.m.

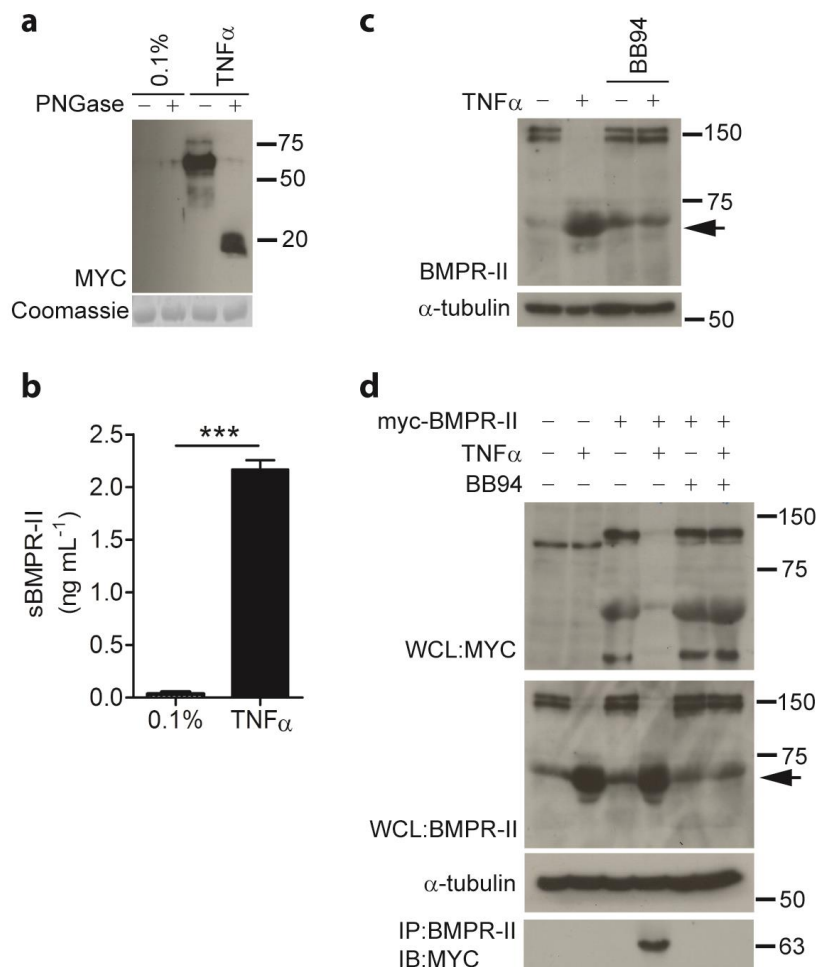

**Supplementary Figure 4. Release of sBMPR-II can be inhibited by a pan-metalloprotease inhibitor.** (a) Representative immunoblot of immunoprecipitated sBMPR-II in conditioned media from control human dPASCs transfected with 5'-myc-tagged BMPR-II and treated with TNF $\alpha$  (1 ng mL<sup>-1</sup>) for 24 h. Samples were deglycosylated with PNGaseF as indicated. Myc expression was assessed using immunoblotting. To ensure equal loading 0.1% FBS was loaded and assessed by Coomassie blue. (b) Assessment of sBMPR-II release by ELISA using control human dPASCs treated with TNF $\alpha$  (1 ng mL<sup>-1</sup>) for 24 h ( $n = 3$ ; Student's  $t$ -test). (c) Representative immunoblot of BMPR-II expression of control human dPASCs pre-treated with batimastat (BB94) (10 ng mL<sup>-1</sup>) for 30 m prior to TNF $\alpha$  (1 ng mL<sup>-1</sup>) treatment for 24 h. (d) Representative immunoblots of BMPR-II, myc and immunoprecipitated sBMPR-II in conditioned media from control human dPASCs transfected with 5'-myc-tagged BMPR-II and pre-treated with batimastat (BB94) (10 ng mL<sup>-1</sup>) for 30 min prior to 24 h TNF $\alpha$  (1 ng mL<sup>-1</sup>) treatment. Blots were re-probed for  $\alpha$ -tubulin to ensure equal loading. The data shown are representative of three experiments. \*\*\* $P \leq 0.001$ . Error bars represent mean  $\pm$  s.e.m. Lower molecular mass BMPR-II is indicated by an arrow.

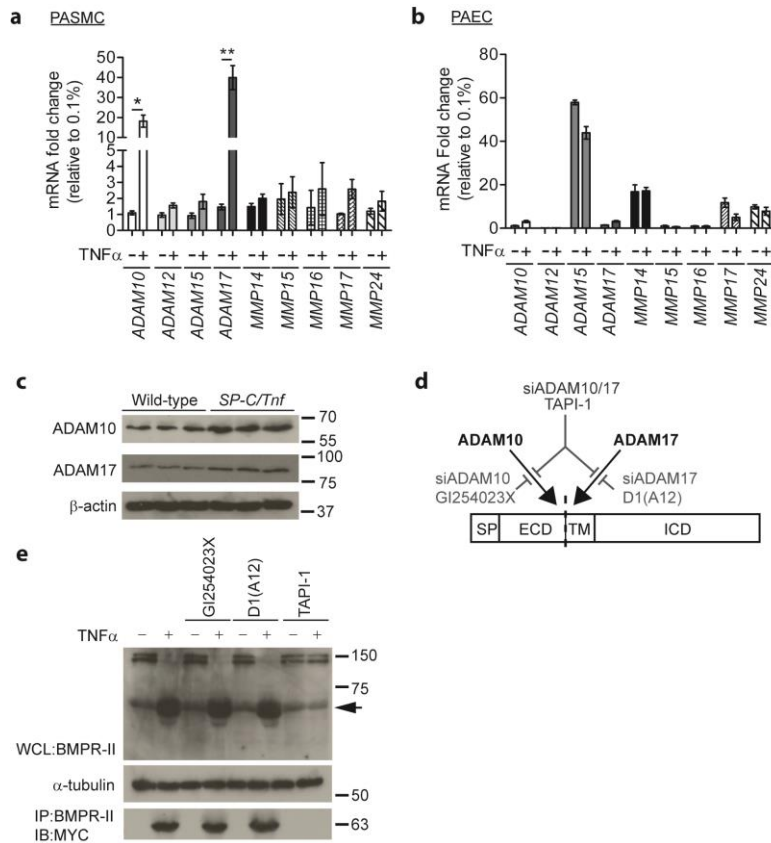

**Supplementary Figure 5. TNF $\alpha$  induces ADAM10/ADAM17 expression, promoting BMPR-II cleavage in SMCs.** (a and b) ADAM10, ADAM12, ADAM15, ADAM17, MMP14, MMP15, MMP16, MMP17 and MMP24 mRNA expression, normalized to ACTB, in human control dPASCs (a) and PAECs (b) treated with TNF $\alpha$  (1 ng mL<sup>-1</sup>) for 24 h. ( $n = 4$ ; Student's  $t$ -test). (c) Representative immunoblots of ADAM10 and ADAM17 expression in lungs isolated from 8 week old *Bmpr2*<sup>+/+</sup> ( $n = 3$ ) and *SP-C/Tnf/Bmpr2*<sup>+/+</sup> ( $n = 3$ ) transgenic mice. Blots were reprobbed for  $\beta$ -actin to ensure equal loading. (d) Schematic of pharmacological and siRNA inhibition of ADAM10 and 17. (e) Representative immunoblots of BMPR-II, myc and immunoprecipitated sBMPR-II in conditioned media from control human dPASCs transfected with 5'-myc-tagged BMPR-II and pre-treated with GI254023X (10  $\mu$ M), D1(A12) (50 nM) or TAPI-1 (10  $\mu$ M) for 30 min prior to 24 h TNF $\alpha$  (1 ng mL<sup>-1</sup>) treatment. Blots were reprobbed for  $\alpha$ -tubulin to ensure equal loading. Data are representative of three experiments. \* $P \leq 0.05$ , \*\* $P \leq 0.01$ . Error bars represent mean  $\pm$  s.e.m. Lower molecular mass BMPR-II is indicated by an arrow.

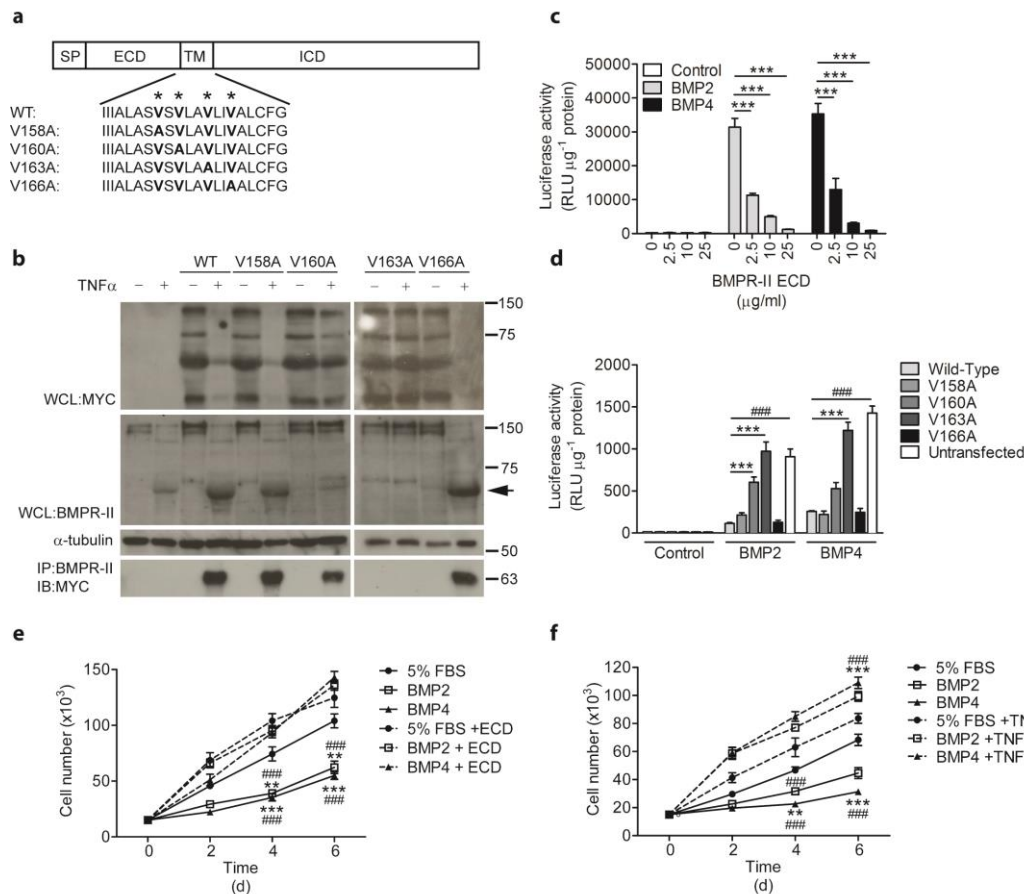

**Supplementary Figure 6. Soluble BMPR-II acts as a ligand trap.** (a) Schematic of full length BMPR-II (SP – signal peptide; ECD – ectodomain; TM – transmembrane; ICD - intracellular cytoplasmic domain). Valines (in bold) in 5'-myc-BMPR-II were converted to alanine (in bold) generating the V158A, V160A, V163A and V166A constructs (positions marked with “\*”). (b) Representative immunoblots of BMPR-II, myc and immunoprecipitated sBMPR-II in conditioned media from control human dPASCs transfected with wild-type and mutant 5'-myc-tagged BMPR-II constructs and treated with TNF $\alpha$  (1 ng mL $^{-1}$ ) for 24 h. Blots were reprobed for  $\alpha$ -tubulin to ensure equal loading. The data shown are representative of three experiments. (c and d) Ligand trap assessment by measuring luciferase activity in C2C12-BRE cells. (c) C2C12-BRE cells were treated with a commercial glycosylated BMPR-II ectodomain (BMPR-II ECD) (2.5, 10 and 25  $\mu$ g mL $^{-1}$ ) and BMP2 or BMP4 (10 ng mL $^{-1}$ ) for 1 h prior to measuring luciferase activity ( $n = 3$ ). (d) C2C12-BRE cells were treated with conditioned media from control human dPASCs transfected with wild type and the mutant 5'-myc-tagged BMPR-II constructs and treated with TNF $\alpha$  (1 ng mL $^{-1}$ ) for 24 h. C2C12-BRE cells were treated with conditioned media and BMP2 or BMP4 (10 ng mL $^{-1}$ ) for 1 h prior to measuring luciferase activity. ( $n = 3$ ). (e and f) Proliferation assessment of human proximal PASCs. (e) Cells were treated BMP2 or BMP4 (10 ng mL $^{-1}$ ) +/- BMPR-II-ECD (25  $\mu$ g mL $^{-1}$ ) every 48 h for 6 days. Cells were counted on days 0, 2, 4 and 6 ( $n = 3$ ; Student's  $t$ -test, \*\* $P \leq 0.01$ , \*\*\* $P \leq 0.001$  compared with 5% FBS; #### $P \leq 0.001$  compared with 5% FBS + BMPR-II ECD). (f) Cells were treated BMP2 or BMP4 (10 ng mL $^{-1}$ ) +/- TNF $\alpha$  (1 ng mL $^{-1}$ ) every 48 h for 6 days. Cells were counted on days 0, 2, 4 and 6 ( $n = 3$ ; Student's  $t$ -test, \*\* $P \leq 0.01$ , \*\*\* $P \leq 0.001$  compared with 5% FBS; #### $P \leq 0.001$  compared with 5% FBS + TNF $\alpha$ ). One-way ANOVA with post-hoc Tukey's for multiple comparisons used in c and d. \*\*\*/#### $P \leq 0.001$ . Error bars represent mean  $\pm$  s.e.m. Lower molecular mass BMPR-II is indicated by an arrow.

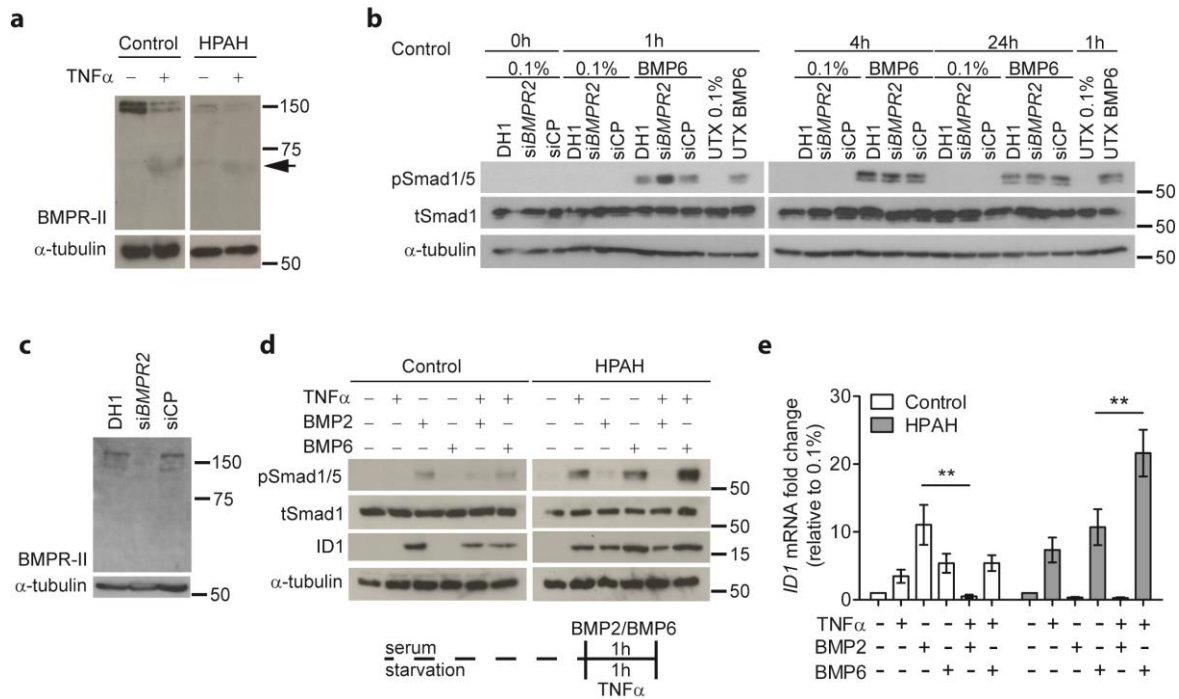

**Supplementary Figure 7. TNF $\alpha$  changes BMP6 signaling dynamics consistent with BMPR-II siRNA.** (a) Representative immunoblots of BMPR-II expression in human dPASCs from disease-free controls and HPAH patients stimulated with TNF $\alpha$  (1 ng mL $^{-1}$ ) for 24 h. Blots were reprobbed for  $\alpha$ -tubulin to ensure equal loading. The data shown are representative of three control and HPAH cell lines. (b and c) Control human dPASCs were transfected with *BMPR2* siRNA (siBMPR2) or control siRNA (siCP) using DharmaFECT1<sup>TM</sup> (DH1) followed by treatment with BMP6 (10 ng mL $^{-1}$ ) in 0.1% FBS for 1,4 or 24 hours. (b) Protein lysates were immunoblotted for phospho-Smad 1/5 and total Smad 1 followed by reprobbed for  $\alpha$ -tubulin to ensure equal loading. Data are representative of three separate experiments. (c) Immunoblotting for BMPR-II to confirm the loss of protein in siBMPR2-transfected PASCs. Blots were reprobbed for  $\alpha$ -tubulin to ensure equal loading. Data are representative of three separate experiments. (d) Immunoblotting of phospho-Smad 1/5, total Smad 1 and ID1 expression in human dPASCs from disease-free controls and HPAH patients co-stimulated with TNF $\alpha$  (1 ng mL $^{-1}$ ) and/or BMP2 or BMP6 (both 10 ng mL $^{-1}$ ) for 1 h. Blots were reprobbed for  $\alpha$ -tubulin to ensure equal loading. Data are representative of three control and HPAH cell lines. (e) *ID1* mRNA expression, normalized to *ACTB*, in human dPASCs from disease-free controls and HPAH patients co-stimulated with TNF $\alpha$  (1 ng mL $^{-1}$ ) and/or BMP2 or BMP6 (both 10 ng mL $^{-1}$ ) for 1 h ( $n = 3$ ; one-way ANOVA with post-hoc Tukey's for multiple comparisons). \*\*  $P \leq 0.01$ . Error bars represent mean  $\pm$  s.e.m. Lower molecular mass BMPR-II is indicated by an arrow.

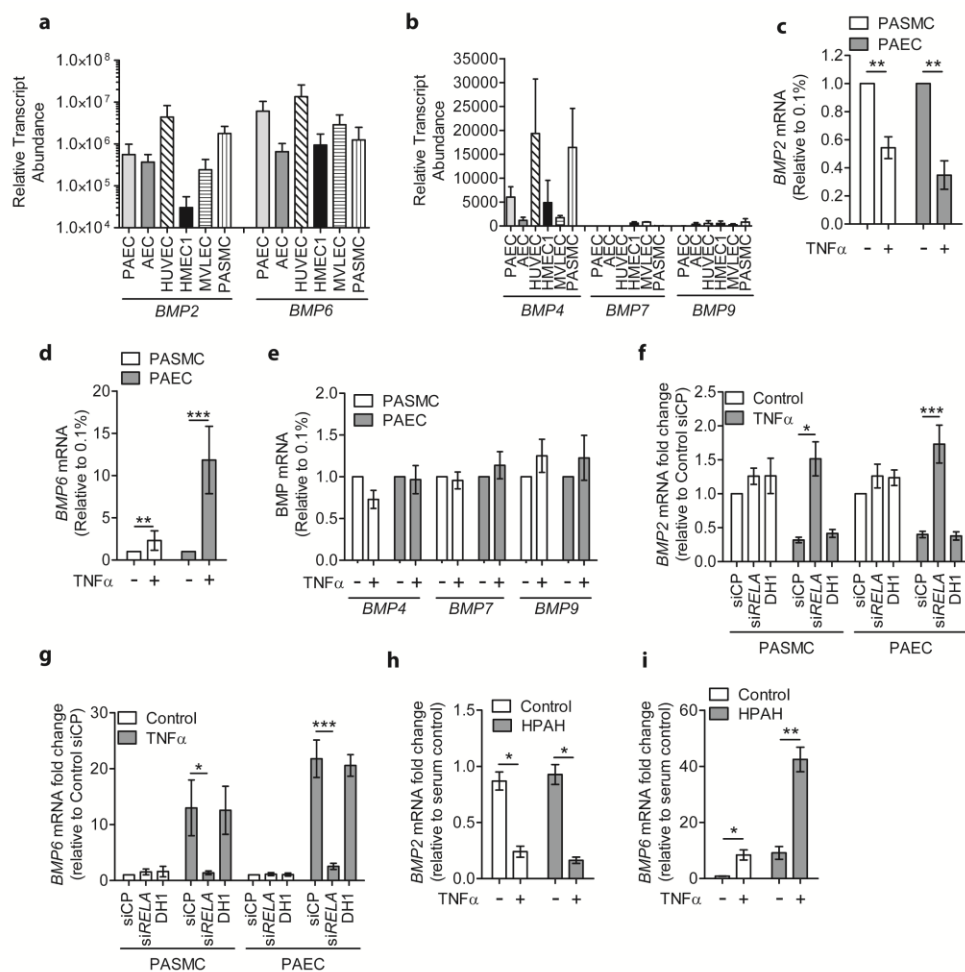

**Supplementary Figure 8. *BMP2* and *BMP6* are the most abundantly expressed ligands in vascular cells.** (a and b) Relative transcript abundance of *BMP2*, *BMP4*, *BMP6*, *BMP7* and *BMP9*, normalized to *B2M* and *ACTB* as detailed in the methods, in endothelial-derived cells (AECs, HMEC1s, HUVECs, HMVLECs, and PAECs) and distal smooth muscle cells (PASCs) ( $n=3$  independent experiments). (c - e) *BMP2* (c), *BMP6* (d), *BMP4*, *BMP7* and *BMP9* (e) mRNA expression, normalized to *ACTB*, in control human dPASCs and PAECs treated with  $TNF\alpha$  ( $1 \text{ ng mL}^{-1}$ ) for 24 h ( $n = 5$ ; Student's *t*-test). (f and g) *BMP2* and *BMP6* mRNA expression, normalized to *ACTB*, in control human dPASCs and PAECs following treatment with DharmaFECT1<sup>TM</sup> alone (DH1), siRELA or non-targeting siRNA control (siCP) with or without 24 h  $TNF\alpha$  ( $1 \text{ ng mL}^{-1}$ ) treatment ( $n = 3$ ; one-way ANOVA with post-hoc Tukey's for multiple comparisons). (h and i) *BMP2* and *BMP6* mRNA expression, normalized to *ACTB*, in human dPASCs from disease-free controls and HPAH patients stimulated with or without  $TNF\alpha$  ( $1 \text{ ng mL}^{-1}$ ) for 24 h ( $n = 3$ ; one-way ANOVA with post-hoc Tukey's for multiple comparisons). PAEC – human pulmonary artery endothelial cells; AEC - human aortic endothelial cells; HMEC1 - human microvascular endothelial cells; HUVEC – human umbilical vein endothelial cells; HMVLEC – human microvascular lung endothelial cells; PASC – human distal pulmonary artery smooth muscle cells. \* $P \leq 0.05$ , \*\* $P \leq 0.01$ , \*\*\* $P \leq 0.001$ . Error bars represent mean  $\pm$  s.e.m.



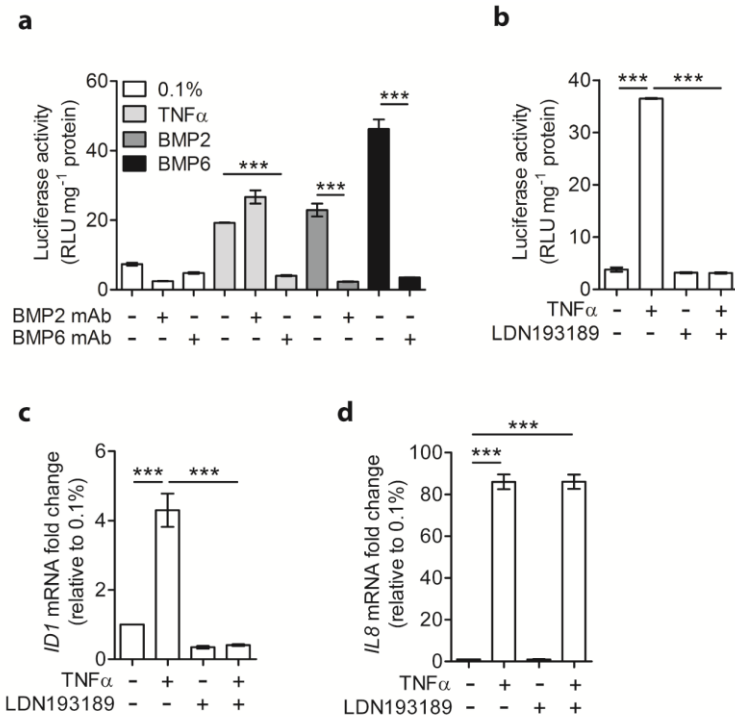

**Supplementary Figure 9. TNF $\alpha$  promotes BMP signalling via BMP6 induction.** (a) C2C12-BRE mouse myoblasts were treated with TNF $\alpha$  (1 ng mL<sup>-1</sup>), BMP2 (10 ng mL<sup>-1</sup>) or BMP6 (10 ng mL<sup>-1</sup>) in the presence or absence of BMP2 mAb (1  $\mu$ g mL<sup>-1</sup>) or BMP6 mAb (1  $\mu$ g mL<sup>-1</sup>) for 24 h prior to measuring luciferase activity ( $n = 3$ ; repeated measures ANOVA with post-hoc Tukey's test). (b) C2C12-BRE mouse myoblasts were treated with TNF $\alpha$  (1 ng mL<sup>-1</sup>) and LDN193189 (250 nM) for 16 h prior to measuring luciferase activity ( $n = 3$ ; repeated measures ANOVA with post-hoc Tukey's test). (c and d) *ID1* and *IL8* mRNA expression, normalized to *ACTB*, in control human dPASCs treated with LDN193189 (250 nM) and/or TNF $\alpha$  (1 ng mL<sup>-1</sup>) for 16 h as indicated. Data are expressed as the fold-change compared to the untreated control ( $n = 5$ ; one-way ANOVA with post-hoc Tukey's for multiple comparisons). \*\*\* $P \leq 0.001$ . Error bars represent mean  $\pm$  s.e.m.

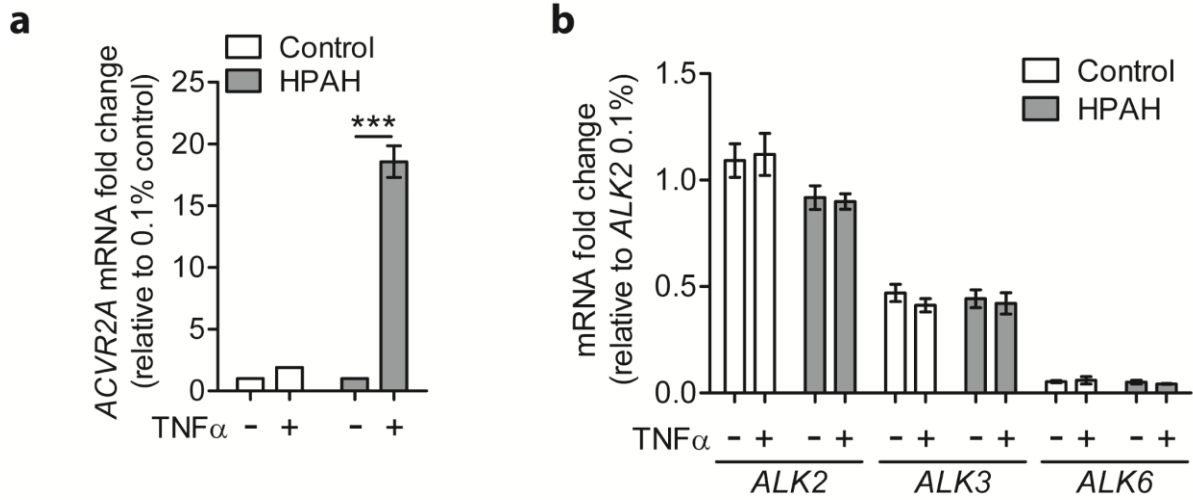

**Supplementary Figure 10. TNF $\alpha$  induces ACVR2A expression in HPAH PSMCs.** (a) ACVR2A mRNA expression, normalized to *ACTB*, in human dPSMCs from disease-free controls and HPAH patients stimulated with TNF $\alpha$  (1 ng mL<sup>-1</sup>) for 24 h ( $n = 3$ ; Student's *t*-test). (b) *ALK2*, *ALK3* and *ALK6* mRNA expression, normalized to *ACTB*, in human dPSMCs from disease-free controls and HPAH patients stimulated with TNF $\alpha$  (1 ng mL<sup>-1</sup>) for 24 h. \*\*\* $P \leq 0.001$ . Error bars represent mean  $\pm$  s.e.m.

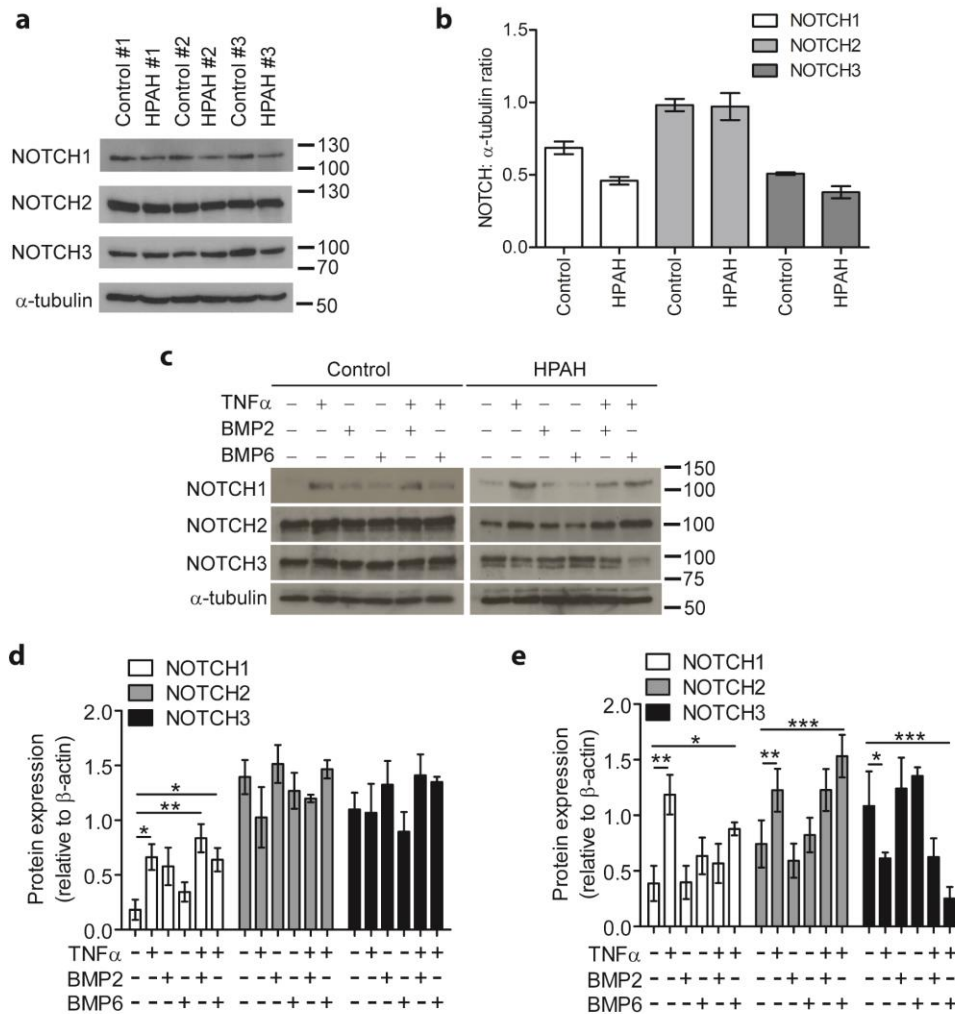

**Supplementary Figure 11. TNF $\alpha$  selectively alters NOTCH expression in HPAH PASCs.** (a) Immunoblotting for cleaved/transmembrane intracellular NTM (NTM) regions for NOTCH1, NOTCH2 and NOTCH3 expression in control disease-free and HPAH dPASCs ( $n=3$  different lines for each). Blots were reprobed for  $\alpha$ -tubulin to ensure equal loading. (b) Densitometry of NTM regions from blots in panel a relative to  $\alpha$ -tubulin levels. (c) Immunoblotting for NTM regions for NOTCH1, NOTCH2 and NOTCH3 expression in control disease-free and HPAH dPASCs treated with TNF $\alpha$  ( $1 \text{ ng mL}^{-1}$ ) and/or BMP2 or BMP6 (both  $10 \text{ ng mL}^{-1}$ ) for 1 h as indicated. Blots were reprobed for  $\alpha$ -tubulin to ensure equal loading. (d and e) Densitometry of NTM regions for immunoblots in panel c relative to  $\alpha$ -tubulin levels. ( $n = 3$ ; Mann-Whitney Test). \* $P \leq 0.05$ , \*\* $P \leq 0.01$ , \*\*\* $P \leq 0.001$ . Error bars represent mean  $\pm$  s.e.m.

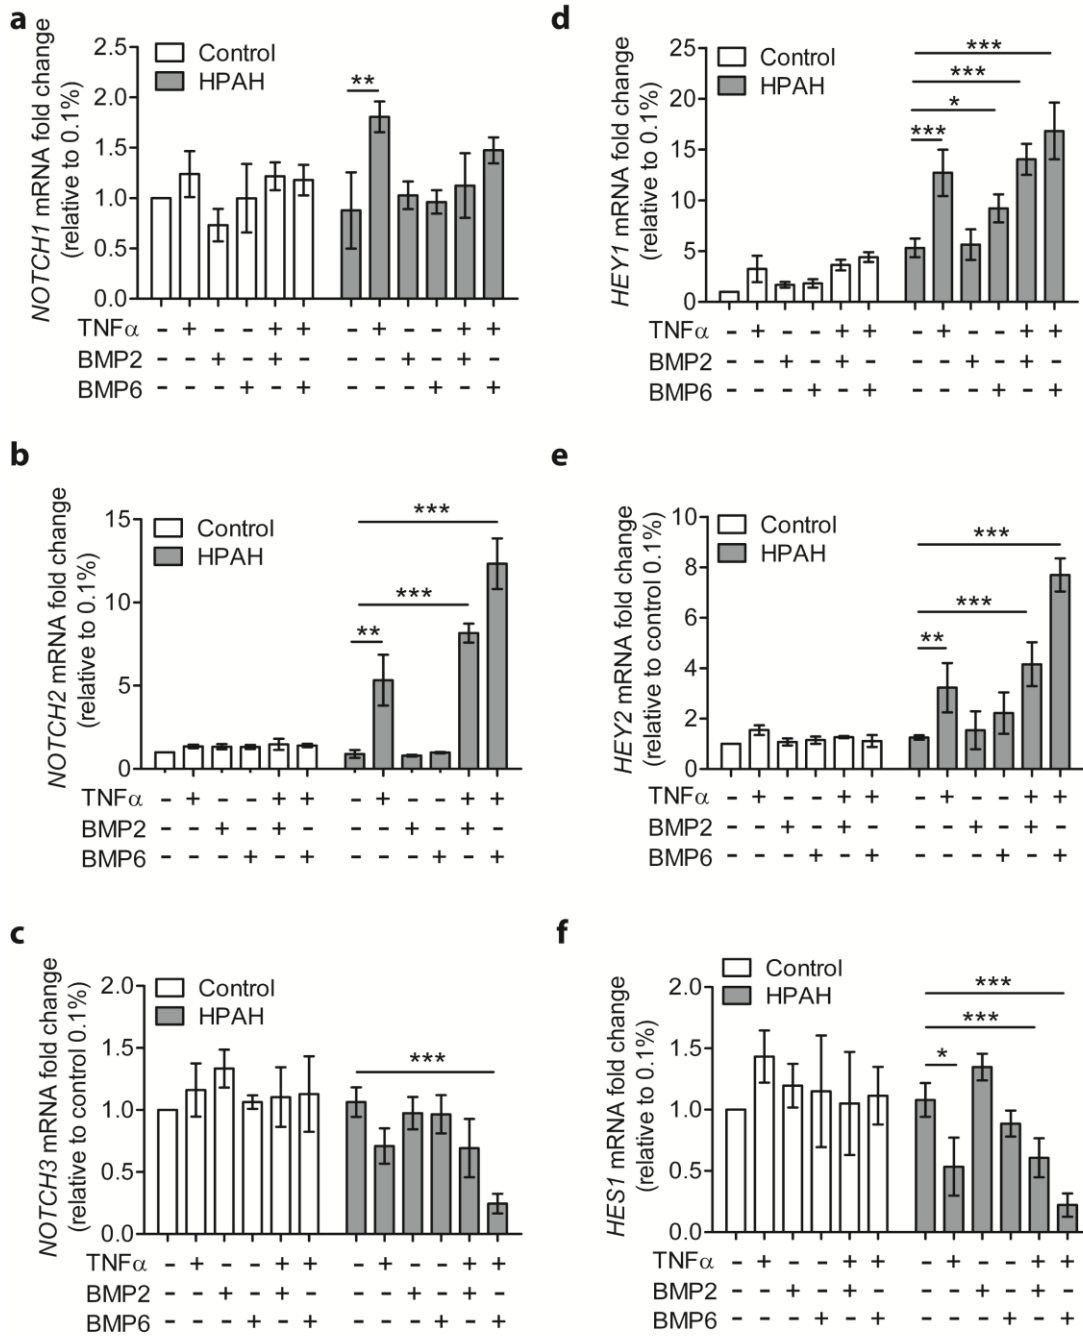

**Supplementary Figure 12. NOTCH and its targets are altered by TNF $\alpha$  in HPAH PASMCs. (a-f) NOTCH1 (a), NOTCH2 (b), NOTCH3 (c), HEY1 (d), HEY2 (e) and HES1 (f) mRNA expression, normalized to *ACTB*, in human dPASMCs from disease-free controls and HPAH patients stimulated with TNF $\alpha$  (1 ng mL $^{-1}$ ) and/or BMP2 or BMP6 (both 10 ng mL $^{-1}$ ) for 1 h as indicated. One-way ANOVA with post-hoc Tukey's for multiple comparisons used in a, b, c, d, e and f. \* $P \leq 0.05$ , \*\* $P \leq 0.01$ , \*\*\* $P \leq 0.001$ . Error bars represent mean  $\pm$  s.e.m.**

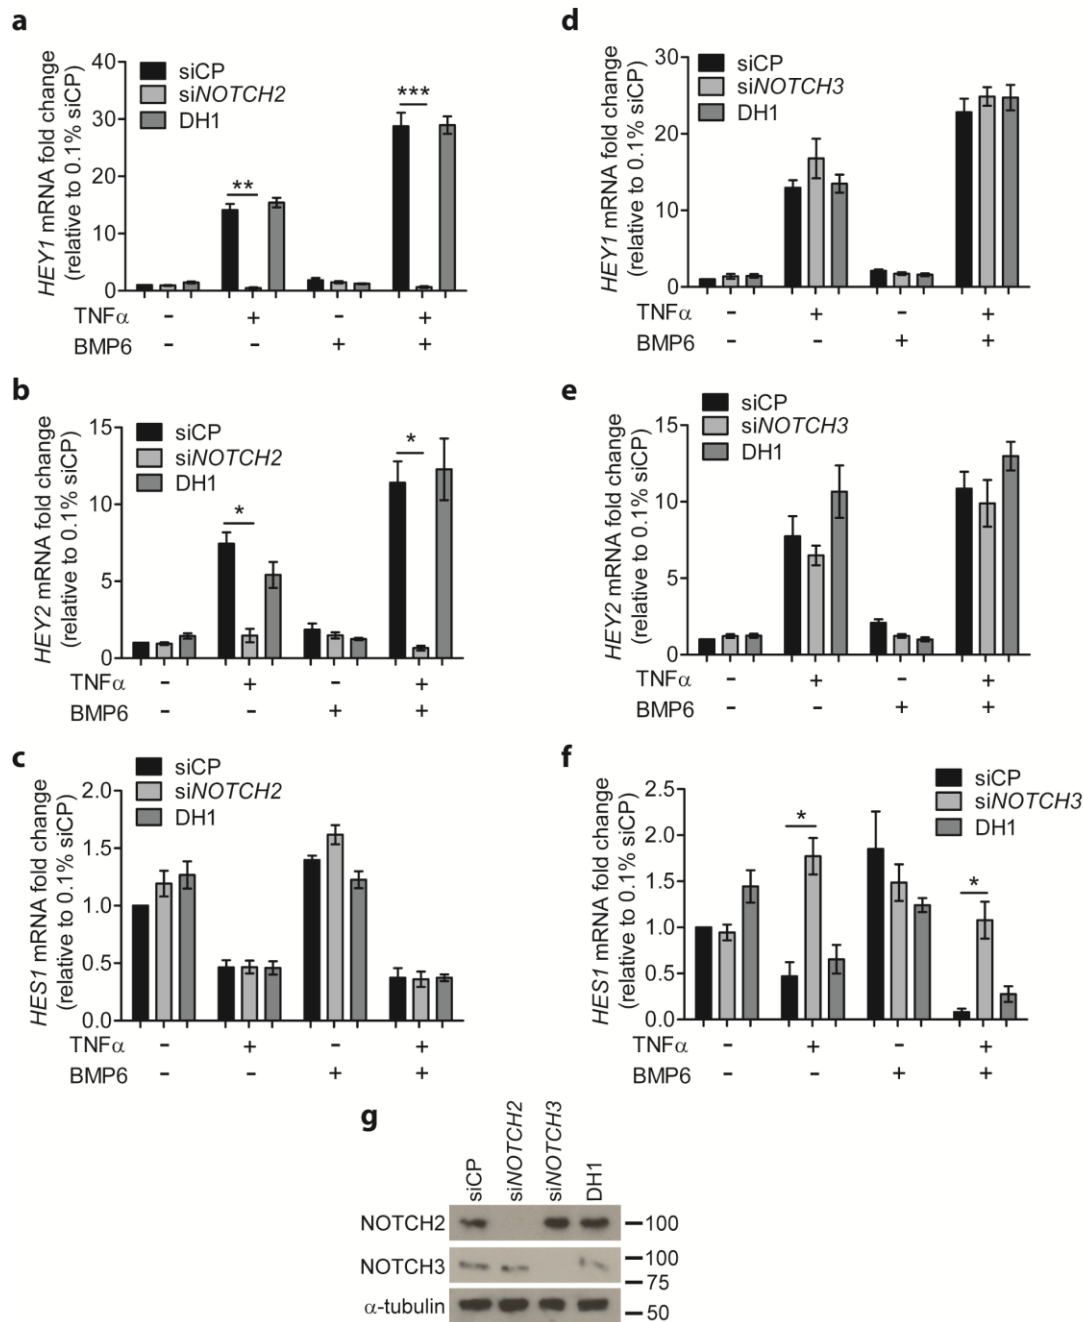

**Supplementary Figure 13. HEY1 and HEY2 are targets of NOTCH2; HES1 is a target of NOTCH3.** (a - c) HEY1 (a), HEY2 (b) and HES1 (c) mRNA expression, normalized to ACTB, in human HPAH dPASCs transfected with DharmaFECT1<sup>TM</sup> alone (DH1), siNOTCH2 or non-targeting siRNA control (siCP) and followed by treatment with TNF $\alpha$  (1 ng mL<sup>-1</sup>) and/or BMP6 (10 ng mL<sup>-1</sup>) for 1 h as indicated ( $n = 3$ ). (d - f) HEY1 (d), HEY2 (e) and HES1 (f) mRNA expression, normalized to ACTB, in human HPAH dPASCs transfected with DharmaFECT1<sup>TM</sup> alone (DH1), siNOTCH3 or non-targeting siRNA control (siCP) followed by treatment with TNF $\alpha$  (1 ng mL<sup>-1</sup>) and/or BMP6 (10 ng mL<sup>-1</sup>) for 1 h as indicated ( $n = 3$ ). (g) Immunoblot of NOTCH2 and NOTCH3 cleaved/transmembrane intracellular (NTM) regions in human HPAH dPASCs transfected with DH1 alone, siNOTCH2, siNOTCH3 or siCP. One-way ANOVA with post-hoc Tukey's for multiple comparisons used in a, b and f. \* $P \leq 0.05$ , \*\* $P \leq 0.01$ , \*\*\* $P \leq 0.001$ . Error bars represent mean  $\pm$  s.e.m.

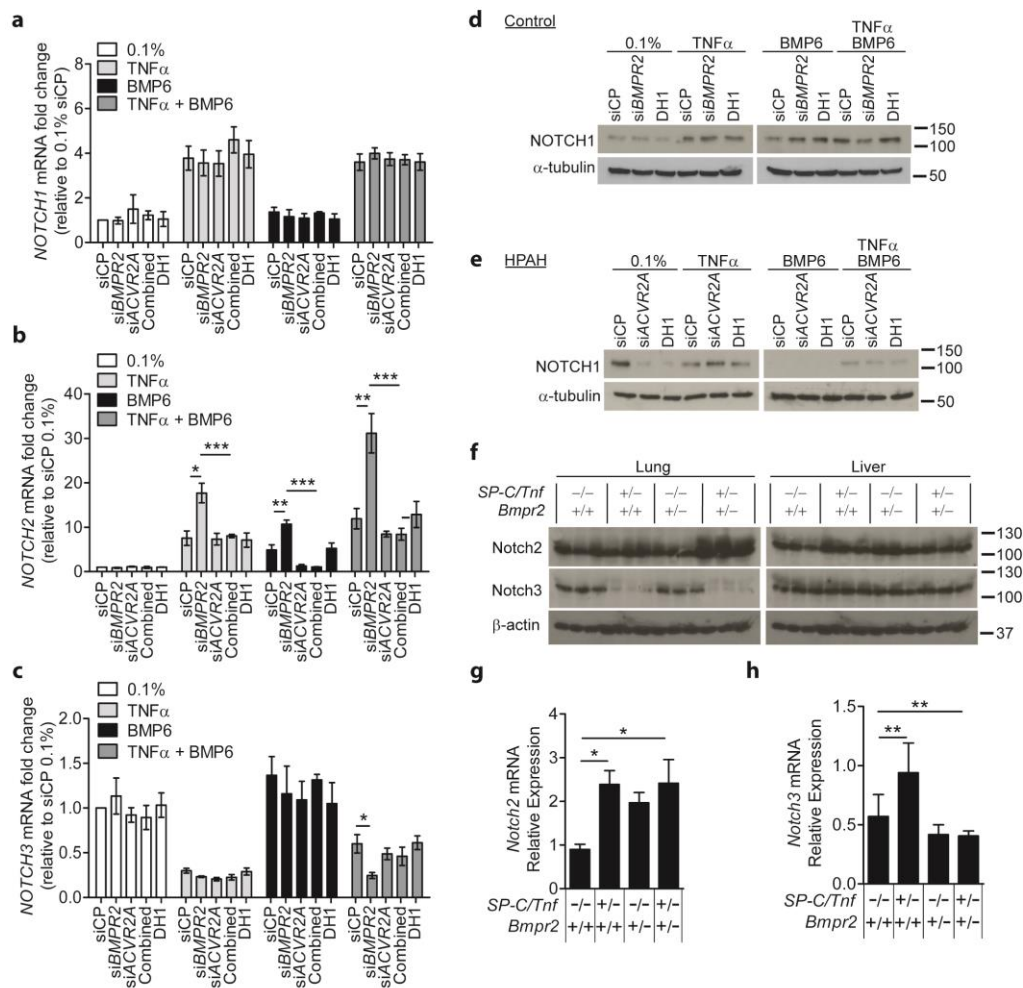

**Supplementary Figure 14. TNF $\alpha$  alters NOTCH expression differentially in BMPR2 deficiency.** (a - c) NOTCH1 (a), NOTCH2 (b) and NOTCH3 (c) mRNA expression, normalized to ACTB, in human control dPASCs transfected with DharmaFECT1<sup>TM</sup> alone (DH1), siBMPR2, siACVR2A, combined siBMPR2 + siACVR2A or non-targeting siRNA control (siCP) followed by treatment with TNF $\alpha$  (1 ng mL<sup>-1</sup>) and/or BMP6 (10 ng mL<sup>-1</sup>) for 1 h as indicated ( $n = 3$ ;  $n = 4$  for NOTCH3). (d and e) Representative immunoblots of NOTCH1 NTM region in (d) human disease-free control PASCs following transfection with DH1 Alone, siBMPR2, or siCP or (e) HPAH dPASCs following transfection with DH1 alone, siACVR2A, or siCP followed by treatment with TNF $\alpha$  (1 ng mL<sup>-1</sup>) and/or BMP6 (10 ng mL) for 1 h as indicated. Reprobed for  $\alpha$ -tubulin to ensure equal loading. The data shown are representative of three experiments. Note that a consistent increase of NOTCH1 NTM region was observed with siCP transfection in HPAH PASCs at baseline. (f) Immunoblots of Notch2 and Notch3 cleaved/transmembrane intracellular (NTM) regions for expression in lungs and livers isolated from 8-9 week old *Bmpr2*<sup>+/+</sup>, *SP-C/Tnf/Bmpr2*<sup>+/+</sup>, *Bmpr2*<sup>+/-</sup> and *SP-C/Tnf/Bmpr2*<sup>+/-</sup> transgenic mice ( $n = 3$  per group). Blots were reprobed for  $\beta$ -actin to ensure equal loading. (g and h) *Notch2* and *Notch3* mRNA expression, normalized to *Actb*, in livers isolated from 8-9 week old *Bmpr2*<sup>+/+</sup>, *SP-C/Tnf/Bmpr2*<sup>+/+</sup>, *Bmpr2*<sup>+/-</sup> and *SP-C/Tnf/Bmpr2*<sup>+/-</sup> transgenic mice ( $n = 4$ ). One-way ANOVA with post-hoc Tukey's for multiple comparisons used in a, b, c, g and h. \* $P \leq 0.05$ , \*\* $P \leq 0.01$ , \*\*\* $P \leq 0.001$ . Error bars represent mean  $\pm$  s.e.m.

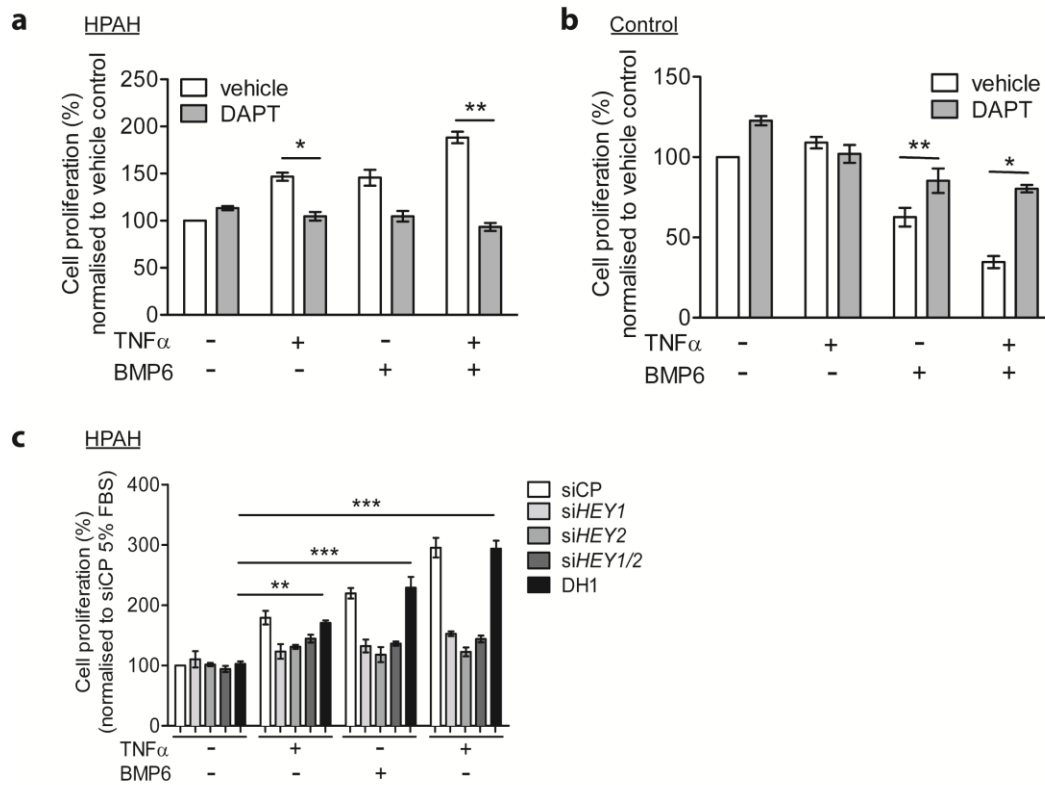

**Supplementary Figure 15. DAPT inhibits TNF $\alpha$  influence on PASMC proliferation.** (a and b) Day 6 assessment of human HPAH (a) and control (b) dPASMCs proliferation following pre-treatment with DAPT (5  $\mu$ M) for 30 min before subsequent TNF $\alpha$  (1 ng mL $^{-1}$ ) and/or BMP6 (50 ng mL $^{-1}$ ) treatment for 24 h ( $n = 3$ ; Student's  $t$ -test). (c) Proliferation of human HPAH dPASMCs on day 6 following transfection with DharmaFECT1<sup>TM</sup> alone (DH1), siHEY1, siHEY2, siHEY1+siHEY2 (siHEY1/2) or non-targeting siRNA control (siCP) and treatment every 48 h with TNF $\alpha$  (1 ng mL $^{-1}$ ) and/or BMP6 (50 ng mL $^{-1}$ ) as indicated ( $n = 3$ ; one-way ANOVA with post-hoc Tukey's for multiple comparisons). \* $P \leq 0.05$ , \*\* $P \leq 0.01$ , \*\*\* $P \leq 0.001$ . Error bars represent mean  $\pm$  s.e.m.

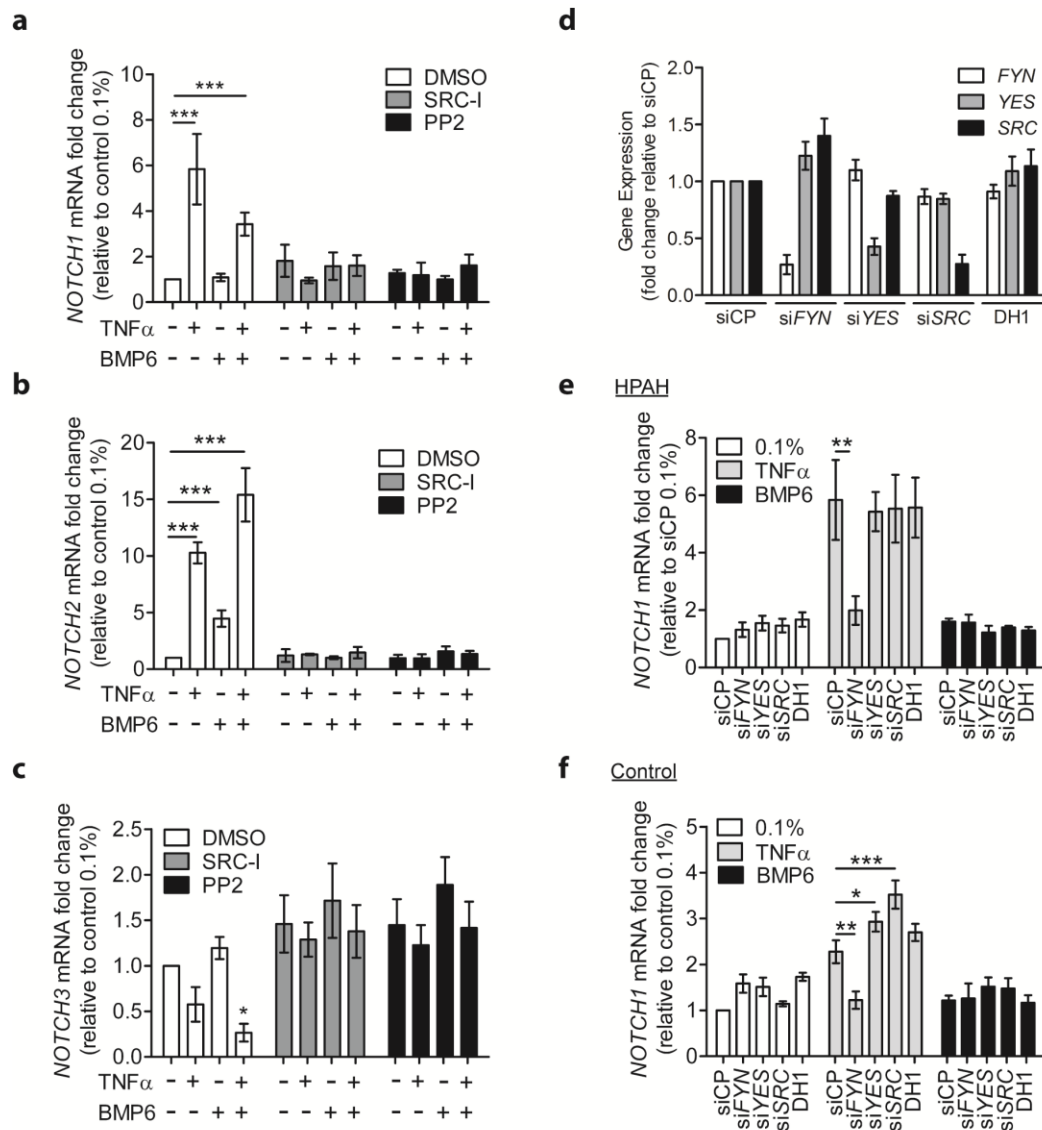

**Supplementary Figure 16. Inhibition of SRC kinases reverses TNF $\alpha$  and BMP6 regulation of NOTCH.** (a - c) *NOTCH1* (a), *NOTCH2* (b) and *NOTCH3* (c) mRNA expression, normalized to *ACTB*, in human HPAH dPASCs pre-incubated with SRC-I (1 $\mu$ M) or PP2 (250 nM) in DMSO for 1 h before stimulation with TNF $\alpha$  (1 ng mL $^{-1}$ ) and/or BMP6 (10 ng mL $^{-1}$ ) for 1 h as indicated ( $n = 3$ ; one-way ANOVA with post-hoc Tukey's for multiple comparisons). (d) Human *FYN*, *YES*, and *SRC* mRNA expression in control dPASCs following transfection with DharmaFECT1<sup>TM</sup> alone (DH1), si*FYN*, si*YES*, si*SRC* or non-targeting siRNA control (siCP). (e and f) *NOTCH1* mRNA expression, normalized to *ACTB*, in control (e) and HPAH (f) human dPASCs following transfection with DH1 alone, si*FYN*, si*YES*, si*SRC* or siCP and treated with TNF $\alpha$  (1 ng mL $^{-1}$ ) and/or BMP6 (10 ng mL $^{-1}$ ) for 1 h as indicated ( $n = 3$ ; one-way ANOVA with post-hoc Tukey's for multiple comparisons). \* $P \leq 0.05$ , \*\* $P \leq 0.01$ , \*\*\* $P \leq 0.001$ . Error bars represent mean  $\pm$  s.e.m.



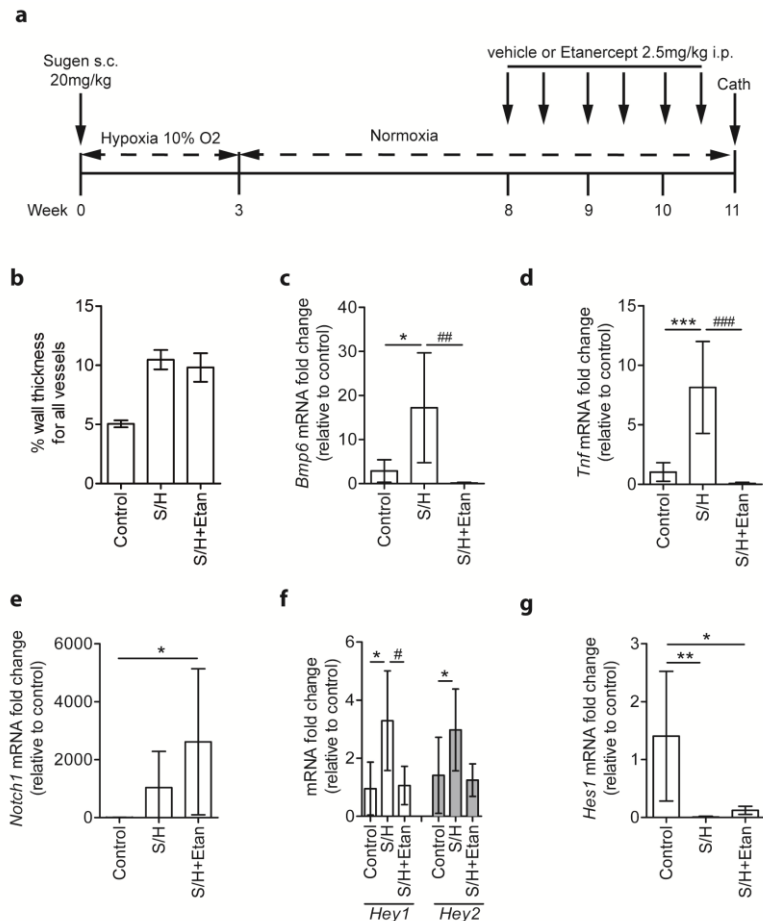

**Supplementary Figure 17. Etanercept reverses established pulmonary hypertension in the Sugent-hypoxia model.** (a) Rats were given vehicle injections and maintained in normoxia (Control,  $n = 6$ ) or challenged with SU-5416 (20 mg/kg, s.c.) and 3 weeks of hypoxia (10% O<sub>2</sub>) before 5 weeks of normoxia and 3 weeks of biweekly treatment with saline vehicle (S/H,  $n = 9$ ) or etanercept (S/H+Etan,  $n = 9$ ; 2.5 mg/kg, i.p.). (b) Assessment of pulmonary arterial wall thickness as a percentage of luminal diameter. (c - g) *Bmp6* (c), *Tnf* (d), *Notch1* (e), *Hey1* and *Hey2* (f) and *Hes1* (g) mRNA expression, normalized to *Actb*, in lungs isolated from control, S/H and S/H+Etan rats ( $n = 6$ ). One-way ANOVA with post-hoc Tukey's for multiple comparisons. S/H = Sugent-hypoxia, S/H+Etan = Sugent-hypoxia + Etanercept  $*/\#P \leq 0.05$ ,  $**/\#\#\#P \leq 0.01$ ,  $***/\#\#\#\#P \leq 0.001$ . Error bars represent mean  $\pm$  s.e.m.

a) Figure 1c\_BMPR-II (left panel)

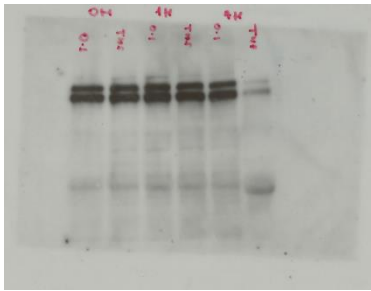

e) Figure 1d\_BMPR-II

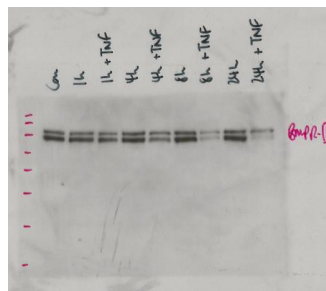

b) Figure 1c\_alpha-tubulin (left panel)

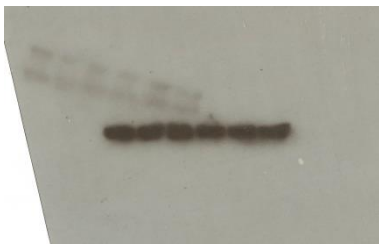

f) Figure 1d\_alpha-tubulin

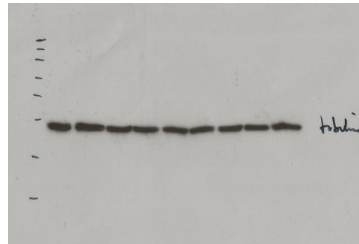

c) Figure 1c\_BMPR-II (right panel)

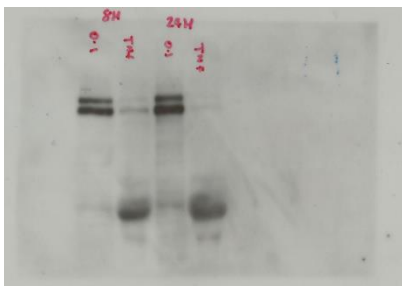

g) Figure 1g\_BMPR-II

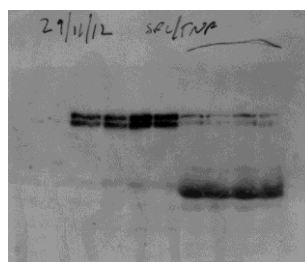

d) Figure 1c\_alpha-tubulin (right panel)

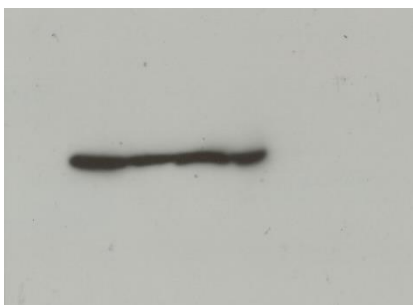

h) Figure 1g\_alpha tubulin

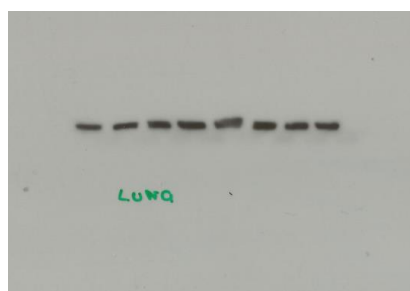

**Supplementary Figure 18. Uncropped western blots for Figures 1c-g.** The relevant figures are indicated in the blot titles.

a) Figure 1h\_BMPR-II (left panel)

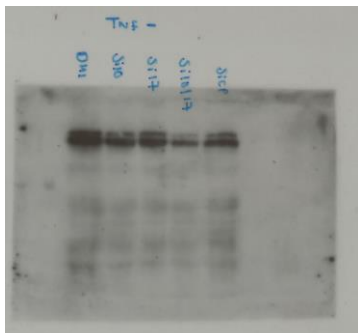

e) Figure 1h\_BMPR-II (right panel)

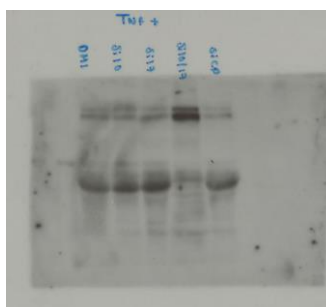

b) Figure 1h\_ADAM10 (left panel)

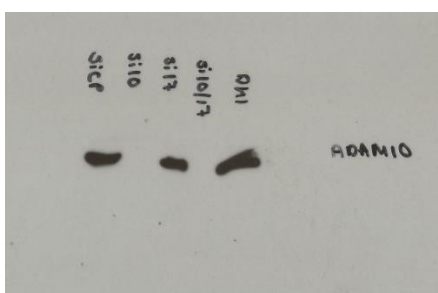

f) Figure 1h\_ADAM10 (right panel)

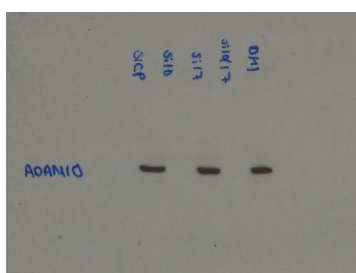

c) Figure 1h\_ADAM17 (left panel)

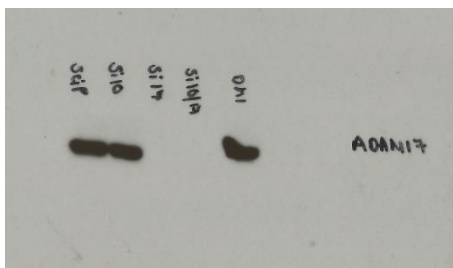

g) Figure 1h\_ADAM17 (right panel)

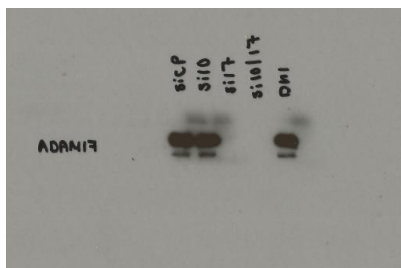

d) Figure 1h\_alpha tubulin (left panel)

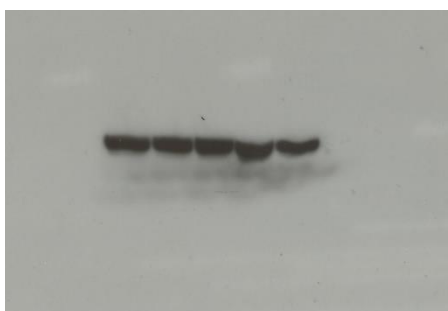

h) Figure 1h\_alpha tubulin (right panel)

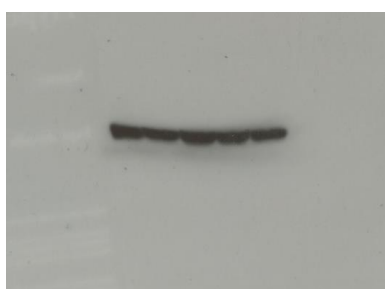

**Supplementary Figure 19. Uncropped western blots for Figure 1h.** The relevant figures are indicated in the blot titles.

a) Figure 2b\_pSMAD1/5 (left panel)

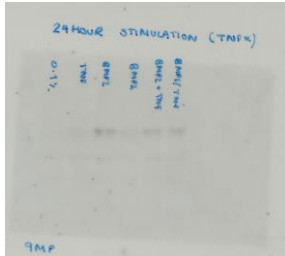

e) Figure 2b\_pSMAD1/5 (right panel)

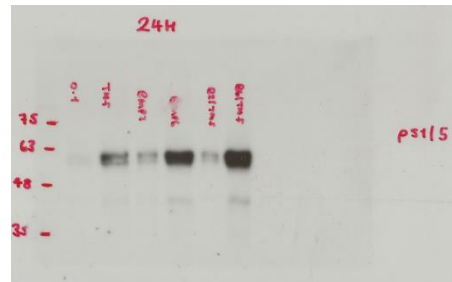

b) Figure 2b\_tSMAD1 (left panel)

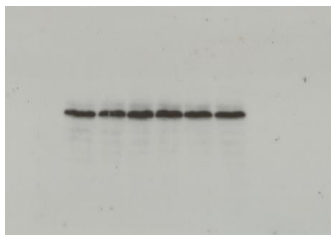

f) Figure 2b\_tSMAD1 (right panel)

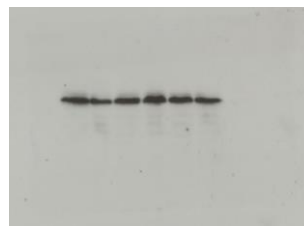

c) Figure 2b\_ID1 (left panel)

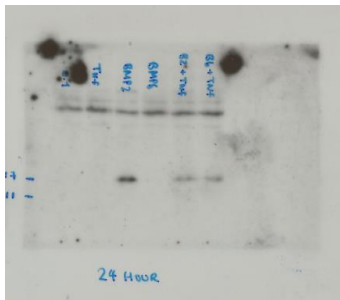

g) Figure 2b\_ID1 (right panel)

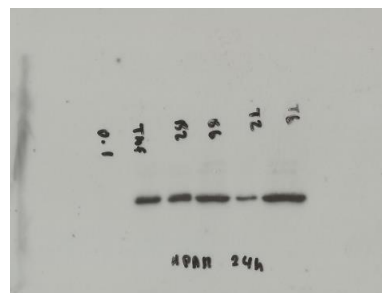

d) Figure 2b\_alpha tubulin (left panel)

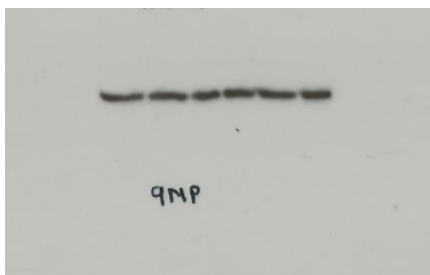

h) Figure 2b\_alpha tubulin (right panel)

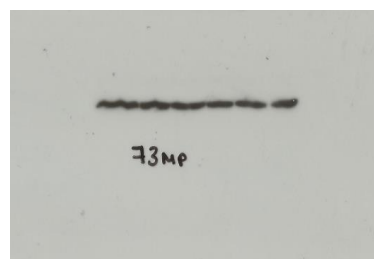

**Supplementary Figure 20. Uncropped western blots for Figure 2b.** The relevant figures are indicated in the blot titles.

a) Figure 3e\_pSMAD1/5 (left panel)

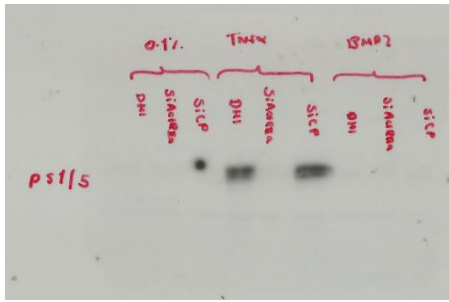

e) Figure 3e\_pSMAD1/5 (right panel)

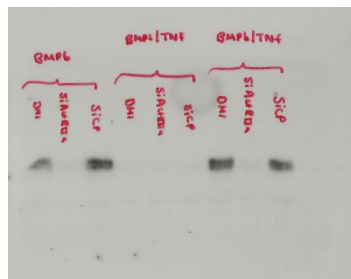

b) Figure 3e\_tSMAD1 (left panel)

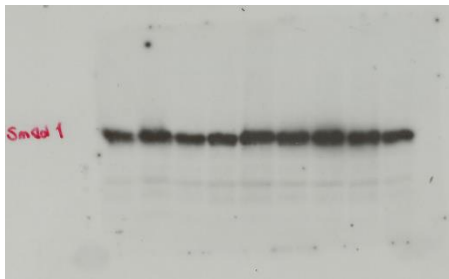

f) Figure 3e\_tSMAD1 (right panel)

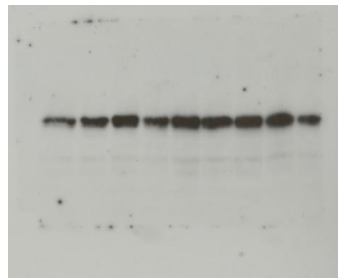

c) Figure 3e\_ID1 (left panel)

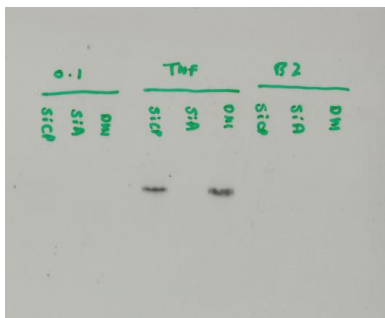

g) Figure 3e\_ID1 (right panel)

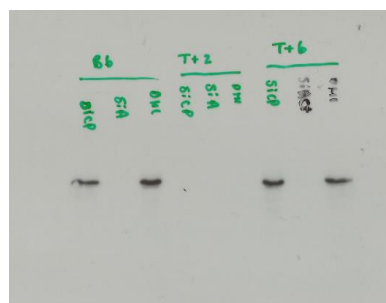

d) Figure 3e\_alpha tubulin (left panel)

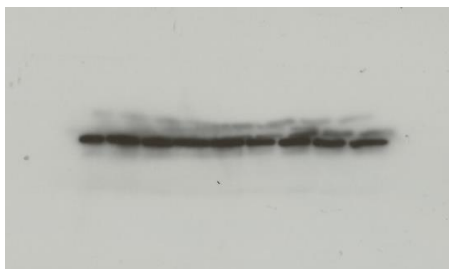

h) Figure 3e\_alpha tubulin (right panel)

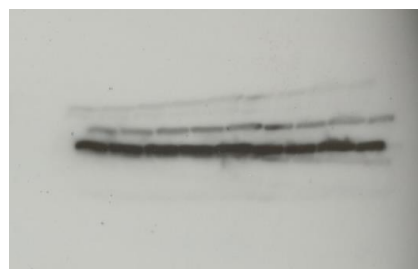

**Supplementary Figure 21. Uncropped western blots for Figure 3e.** The relevant figures are indicated in the blot titles.

a) Figure 4a\_NOTCH2 (left panel)

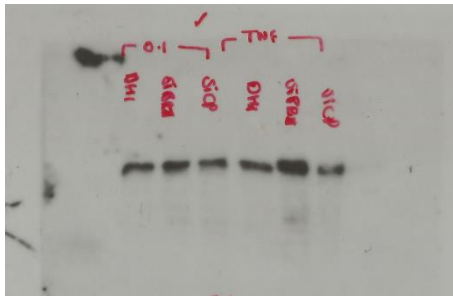

d) Figure 4a\_NOTCH2 (right panel)

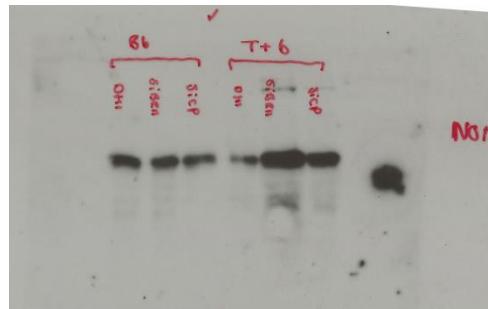

b) Figure 4a\_NOTCH3 (left panel)

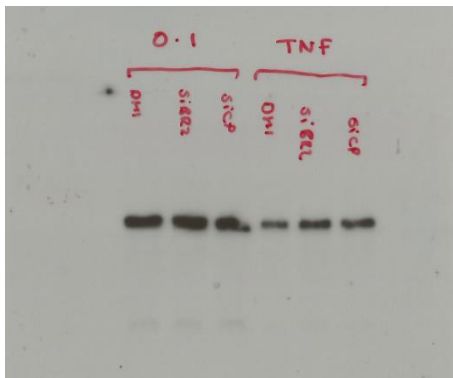

e) Figure 4a\_NOTCH3 (right panel)

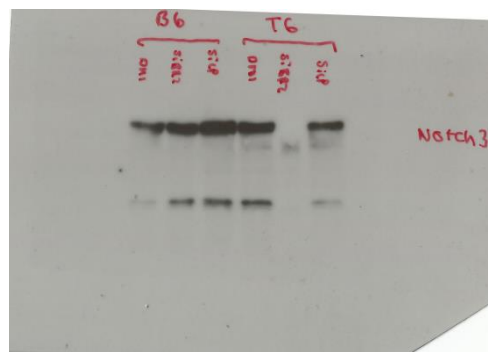

c) Figure 4a\_alpha tubulin (left panel)

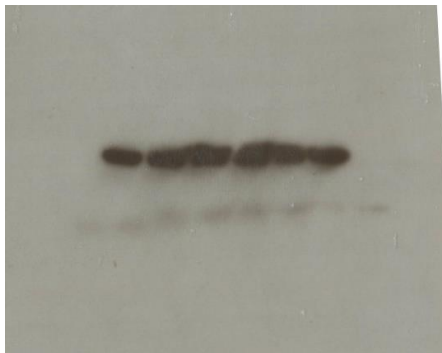

f) Figure 4a\_alpha tubulin (right panel)

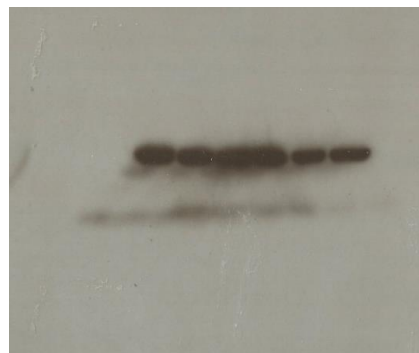

**Supplementary Figure 22. Uncropped western blots for Figure 4a.** The relevant figures are indicated in the blot titles.

a) Figure 4b\_NOTCH2 (left panel)

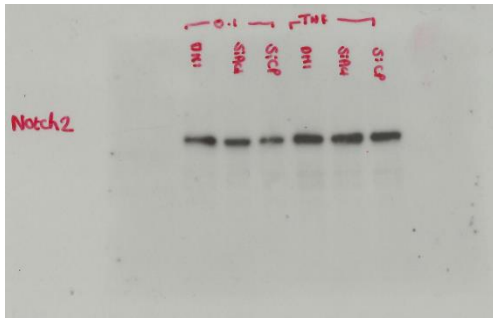

d) Figure 4b\_NOTCH2 (right panel)

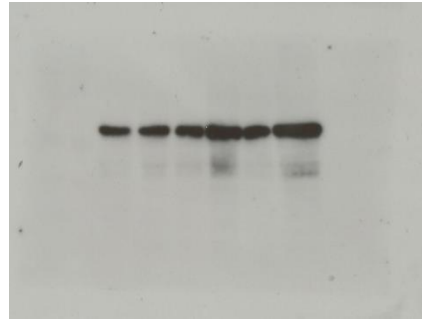

b) Figure 4b\_NOTCH3 (left panel)

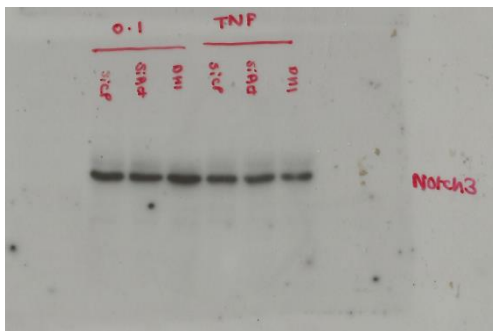

e) Figure 4b\_NOTCH3 (right panel)

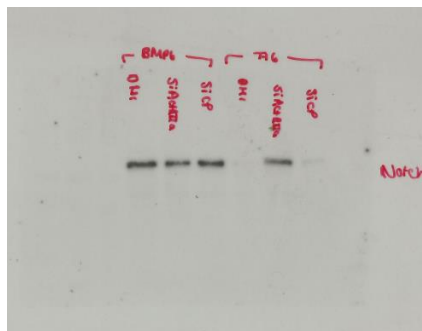

c) Figure 4b\_alpha tubulin (left panel)

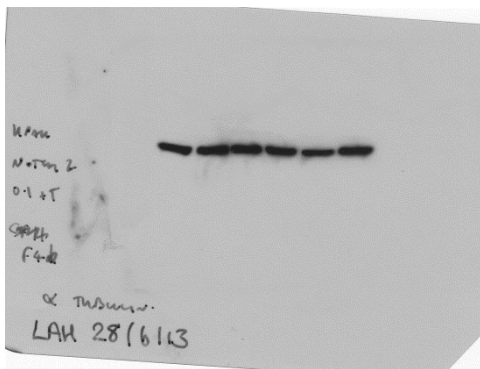

f) Figure 4b\_alpha tubulin (right panel)

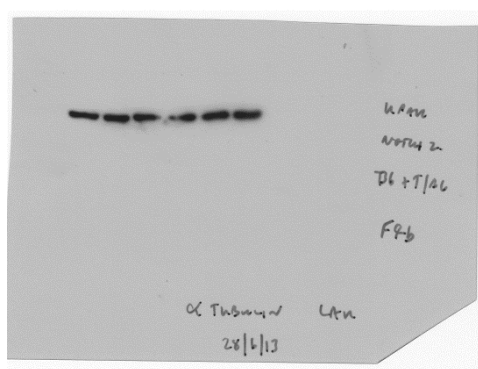

**Supplementary Figure 23. Uncropped western blots for Figure 4b.** The relevant figures are indicated in the blot titles.

a) Figure 5b\_pSRC(527) (left panel)

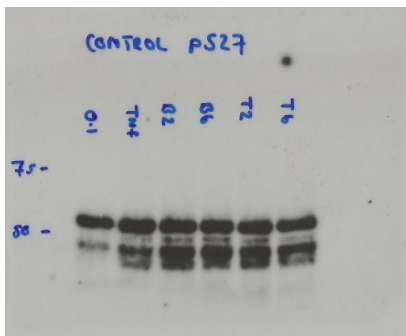

e) Figure 5b\_pSRC(527) (right panel)

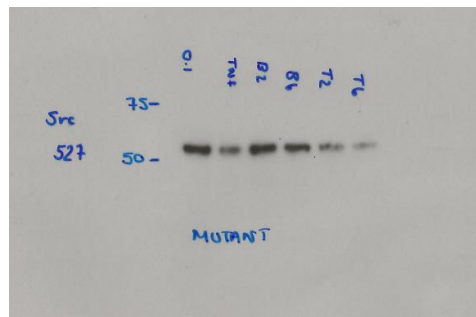

b) Figure 5b\_pSRC(416) (left panel)

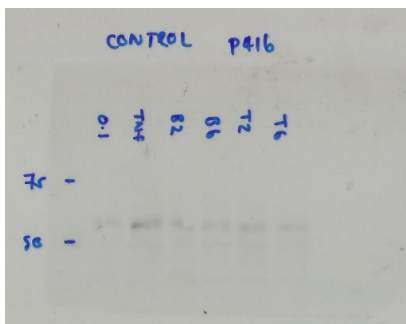

f) Figure 5b\_pSRC(416) (right panel)

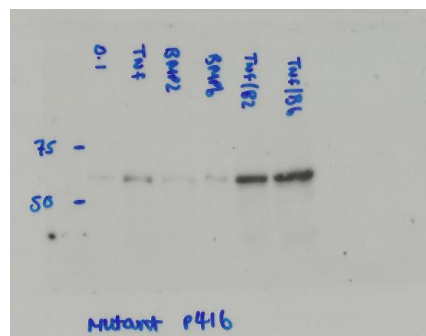

c) Figure 5b\_SRC (left panel)

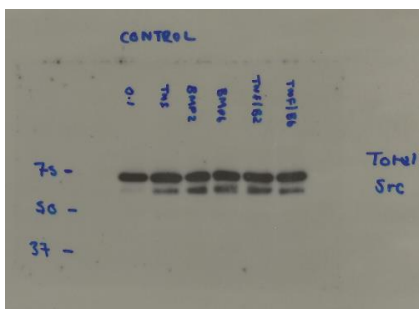

g) Figure 5b\_SRC (right panel)

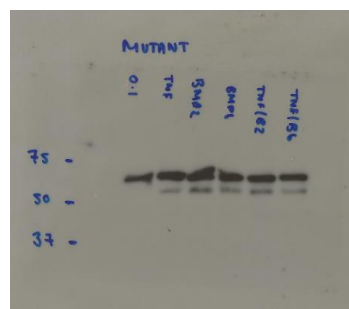

d) Figure 5b\_alpha tubulin (left panel)

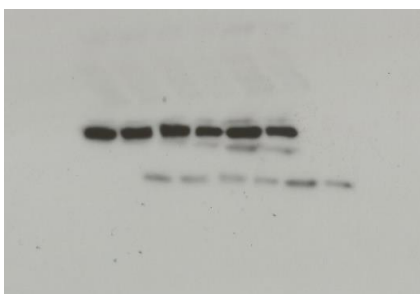

h) Figure 5b\_alpha tubulin (right panel)

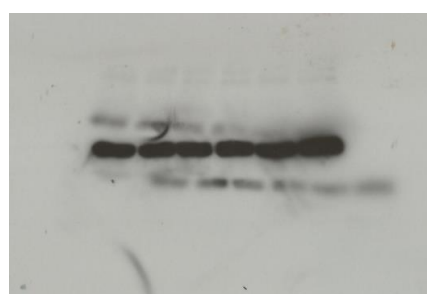

**Supplementary Figure 24. Uncropped western blots for Figure 5b.** The relevant figures are indicated in the blot titles.



a) Figure 5c\_pSRC(527) (left panel)

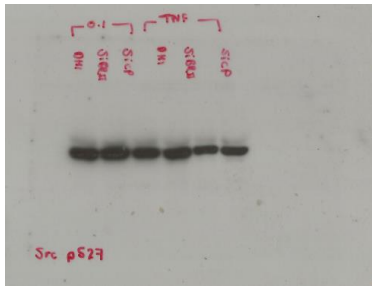

e) Figure 5c\_pSRC(527) (right panel)

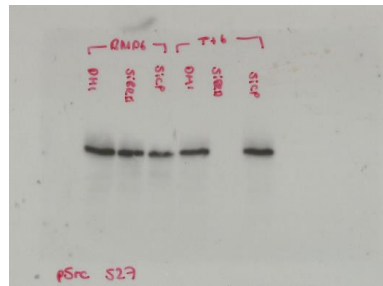

b) Figure 5c\_pSRC(416) (left panel)

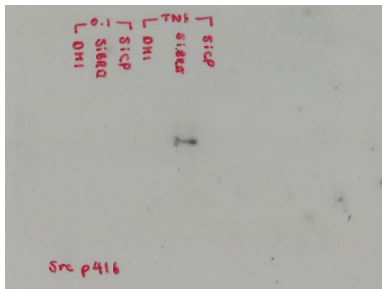

f) Figure 5c\_pSRC(416) (right panel)

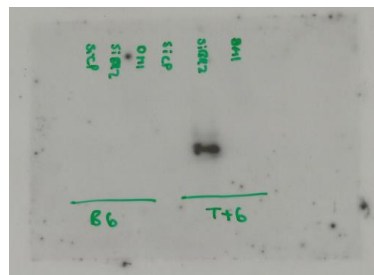

c) Figure 5c\_SRC (left panel)

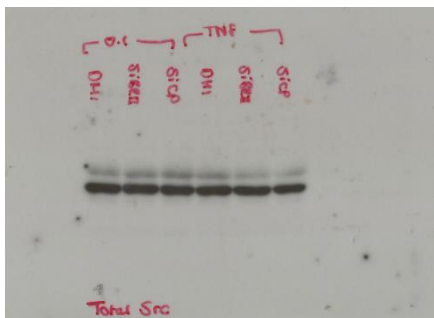

g) Figure 5c\_SRC (right panel)

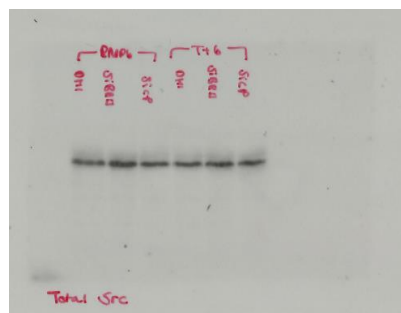

d) Figure 5c\_alpha tubulin (left panel)

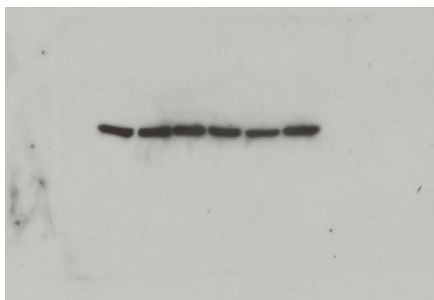

h) Figure 5c\_alpha tubulin (right panel)

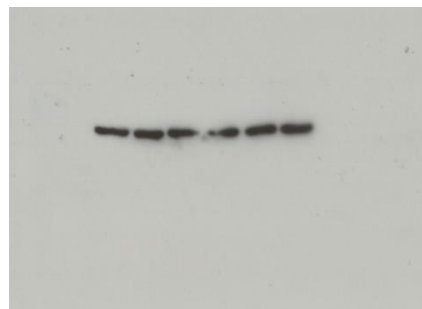

**Supplementary Figure 25. Uncropped western blots for Figure 5c.** The relevant figures are indicated in the blot titles.

a) Figure 5d\_pSRC(527) (left panel)

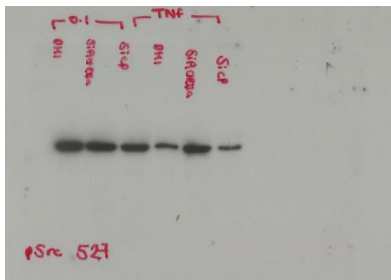

e) Figure 5d\_pSRC(527) (right panel)

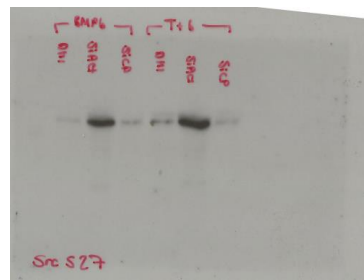

b) Figure 5d\_pSRC(416) (left panel)

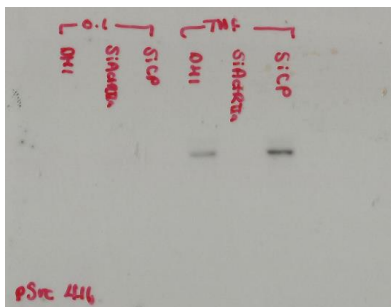

f) Figure 5d\_pSRC(416) (right panel)

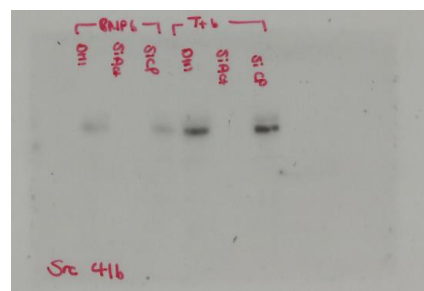

c) Figure 5d\_SRC (left panel)

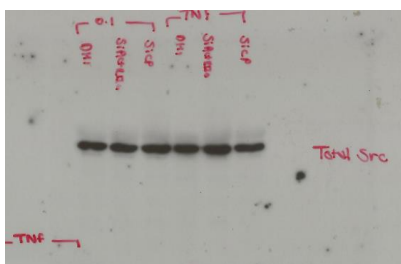

g) Figure 5d\_SRC (right panel)

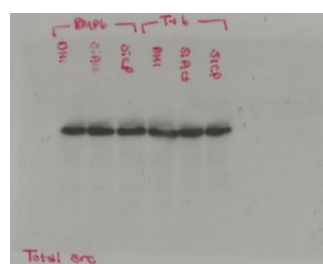

d) Figure 5d\_alpha tubulin (left panel)

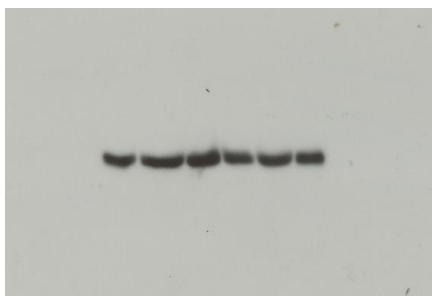

h) Figure 5d\_alpha tubulin (right panel)

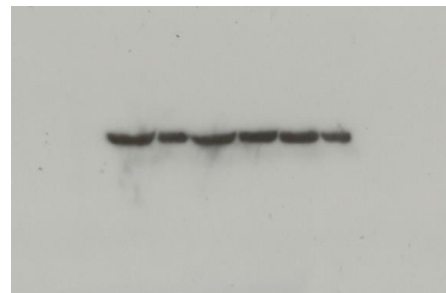

**Supplementary Figure 26. Uncropped western blots for Figure 5d.** The relevant figures are indicated in the blot titles.

a) Figure 6e\_BMPR-II

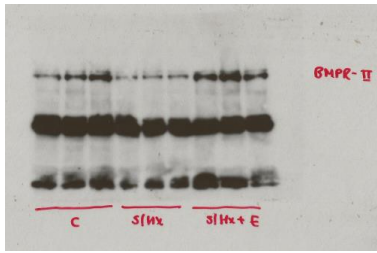

f) Figure 6e\_Cleaved caspase-3

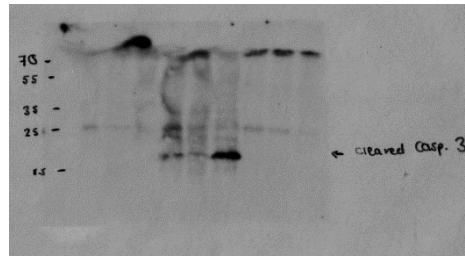

b) Figure 6e\_pSmad1/5

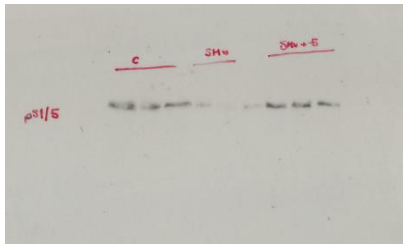

g) Figure 6e\_caspase-3

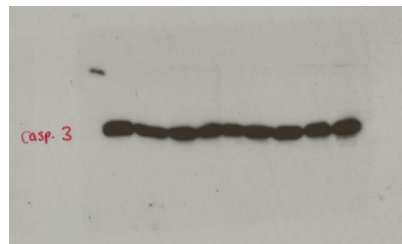

c) Figure 6e\_Smad1

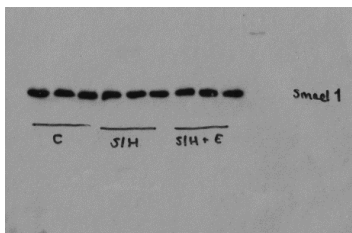

h) Figure 6e\_alpha-SMA

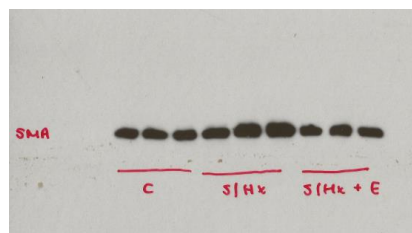

d) Figure 6e\_Notch2

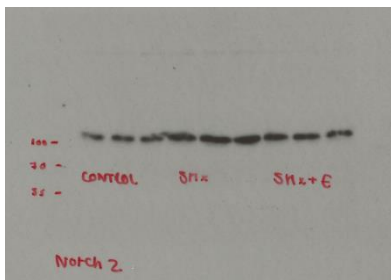

i) Figure 6e\_alpha tubulin

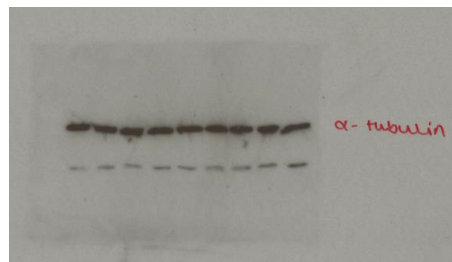

e) Figure 6e\_Notch3

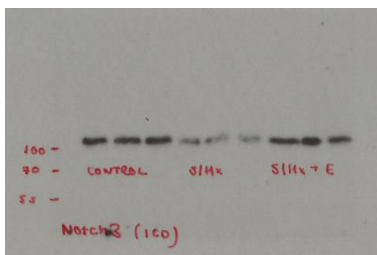

**Supplementary Figure 27. Uncropped western blots for Figure 6e.** The relevant figures are indicated in the blot titles.

a) Supplement Fig 1a\_BMPR-II

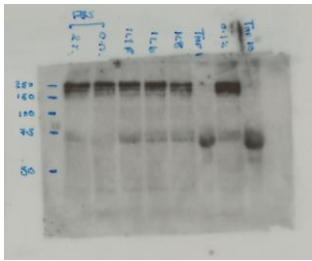

b) Supplement Fig 1a\_alpha tubulin

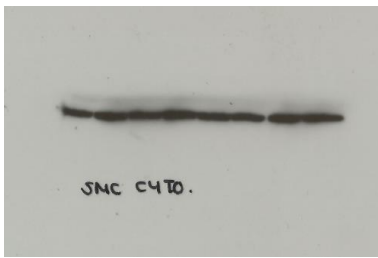

c) Supplement Fig 1b\_BMPR-II

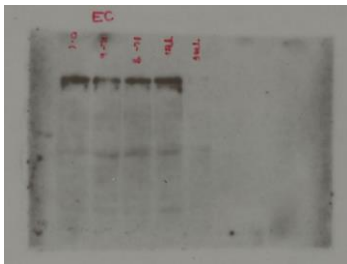

d) Supplement Fig 1b\_alpha tubulin

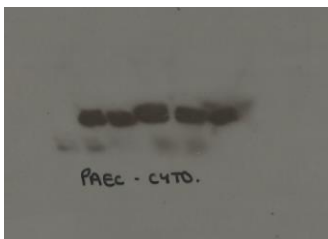

e) Supplement Fig 2a\_BMPR-II

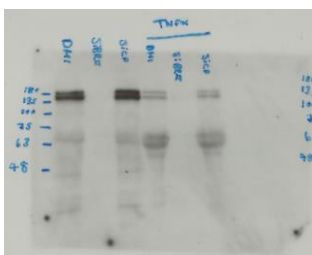

f) Supplement Fig 2a\_alpha tubulin

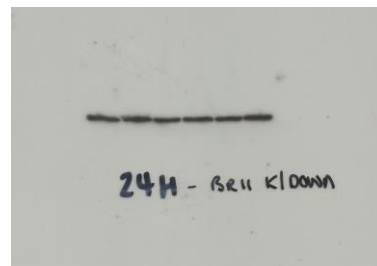

g) Supplement Fig 2b\_BMPR-II

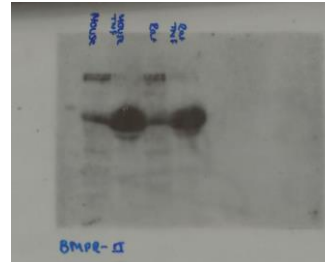

h) Supplement Fig 2b\_alpha tubulin

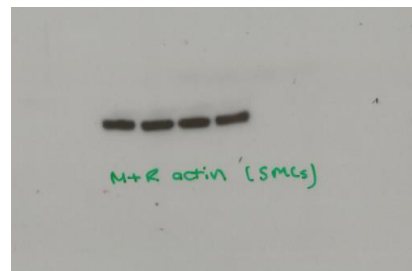

i) Supplement Fig 2c\_BMPR-II

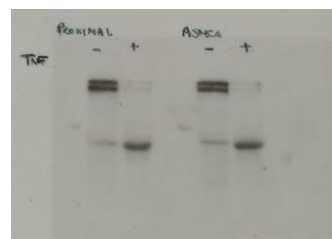

j) Supplement Fig 2c\_alpha tubulin

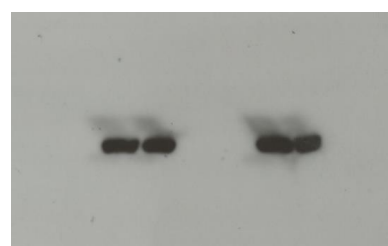

**Supplementary Figure 28. Uncropped western blots for Supplementary Figures 1a, 1b, 2a, 2b and 2c. The relevant figures are indicated in the blot titles.**

a) Supplement Fig 3e\_BMPR-II

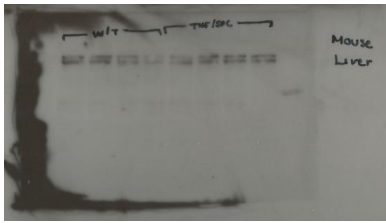

b) Supplement Fig 3e\_alpha tubulin

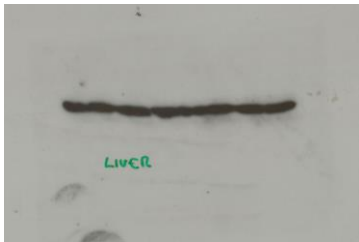

c) Supplement Fig 4a\_MYC

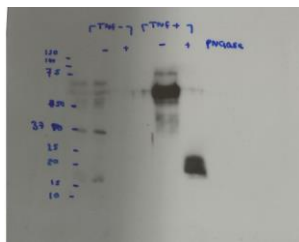

d) Supplement Fig 4a\_Coomassie

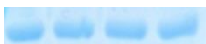

e) Supplement Fig 4c\_BMPR-II  
IB:MYC

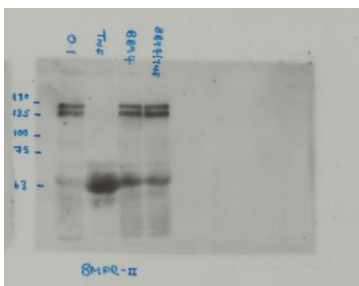

f) Supplement Fig 4c\_alpha tubulin

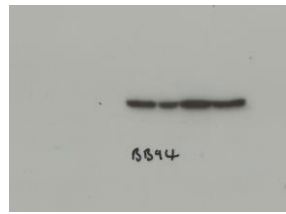

g) Supplement Fig 4d\_WCL:MYC

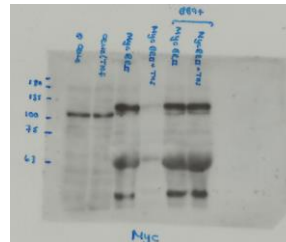

h) Supplement Fig 4d WCL:BMPR-II

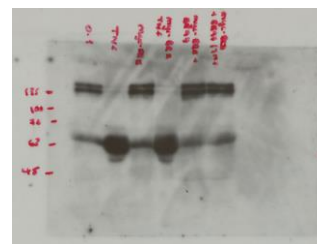

i) Supplement Fig 4d\_alpha tubulin

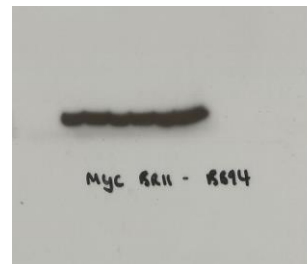

j) Supplement Fig 4d\_IP:BMPPR-II

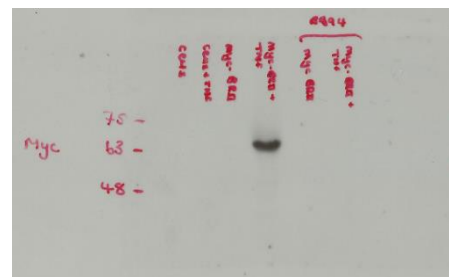

**Supplementary Figure 29. Uncropped western blots for Supplementary Figures 3e, 4a, 4c and 4d. The relevant figures are indicated in the blot titles.**

a) Supplement Fig 5c\_ADAM10

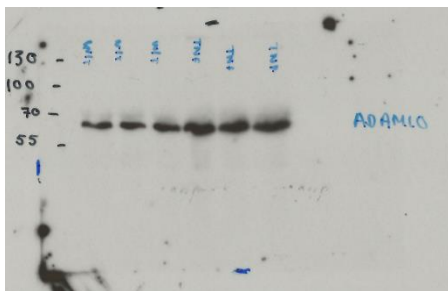

d) Supplement Fig 5e\_BMPR-II

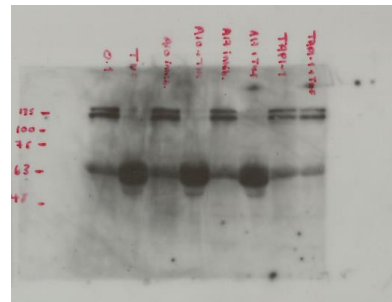

b) Supplement Fig 5c\_ADAM17

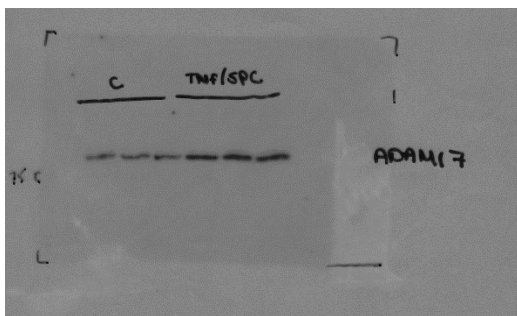

e) Supplement Fig 5e\_alpha tubulin

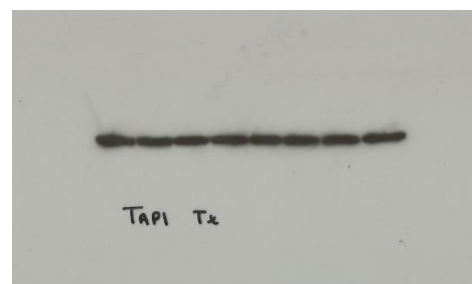

c) Supplement Fig 5c\_beta actin

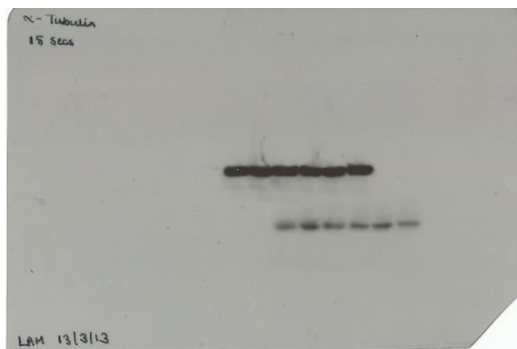

f) Supplement Fig 5e\_IP:BMPR-II IB:MYC

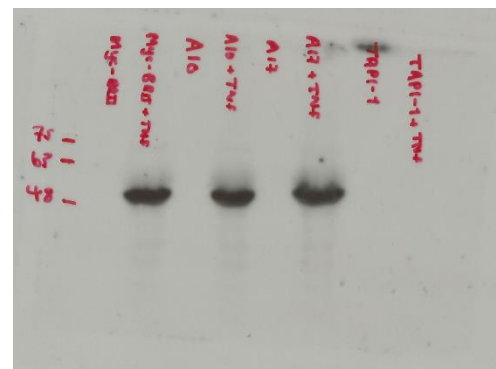

**Supplementary Figure 30. Uncropped western blots for Supplementary Figures 5c and 5e. The relevant figures are indicated in the blot titles.**

a) Supplement Fig 6b\_WCL:MYC (left panel)

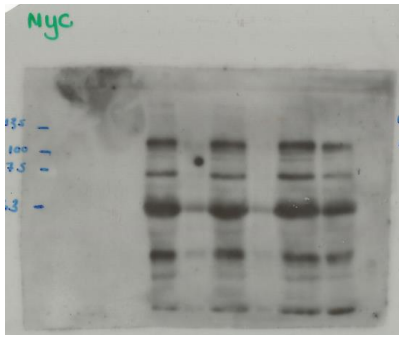

e) Supplement Fig 6b\_WCL:MYC (right panel)

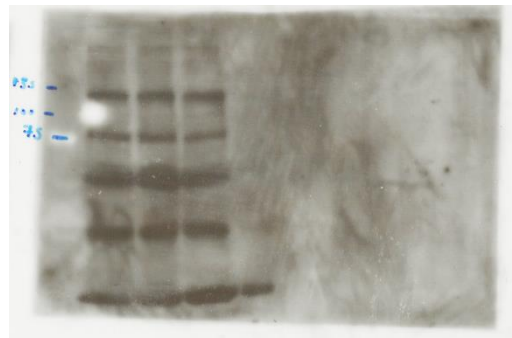

b) Supplement Fig 6b\_BMPR-II (left panel)

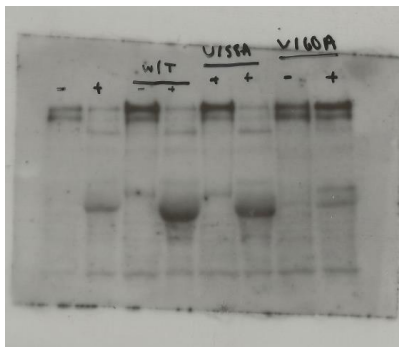

f) Supplement Fig 6b\_BMPR-II (right panel)

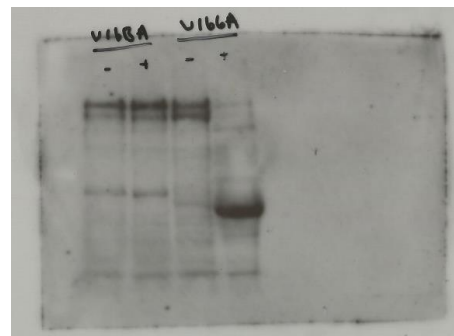

c) Supplement Fig 6b\_alpha tubulin (left panel)

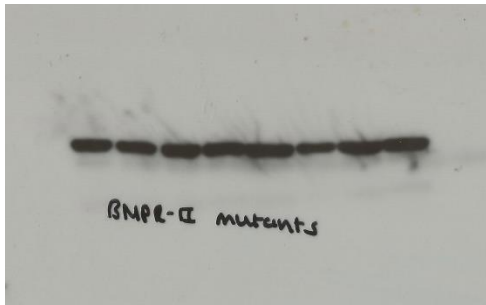

g) Supplement Fig 6b\_alpha tubulin (right panel)

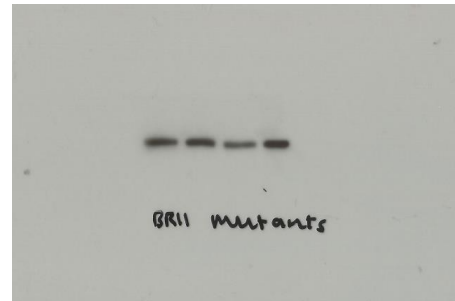

d) Supplement Fig 6b\_IB:MYC (left panel)

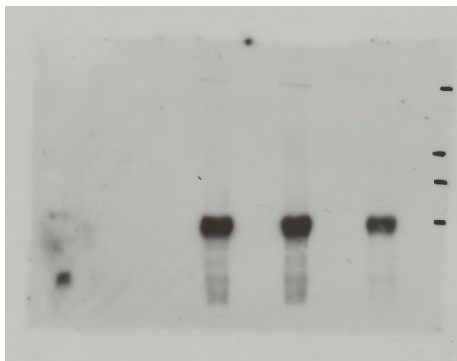

h) Supplement Fig 6b\_IB:MYC (right panel)

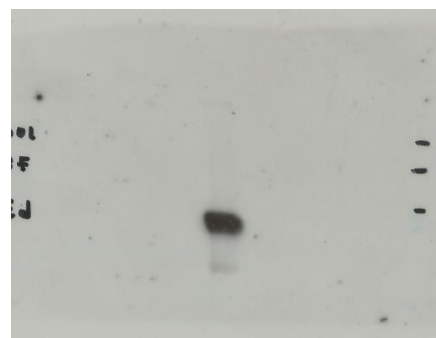

**Supplementary Figure 31. Uncropped western blots for Supplementary Figures 5c and 5e. The relevant figures are indicated in the blot titles.**

a) Supplement Fig 7a\_BMPR-II (left panel)

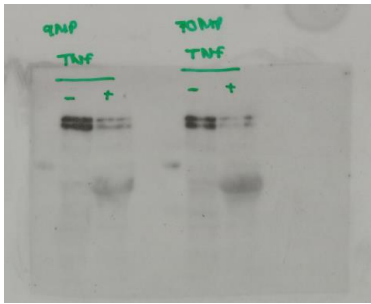

b) Supplement Fig 7a\_alpha tubulin (left panel)

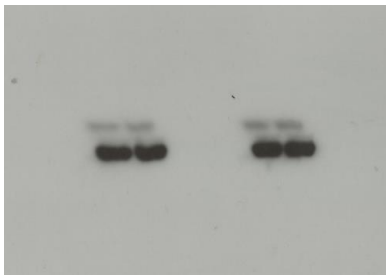

c) Supplement Fig 7a\_BMPR-II (right panel)

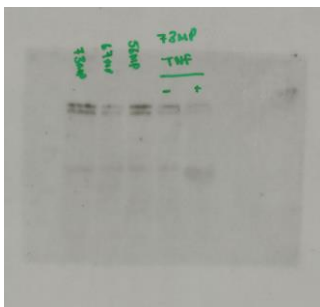

d) Supplement Fig 7a\_alpha tubulin (right panel)

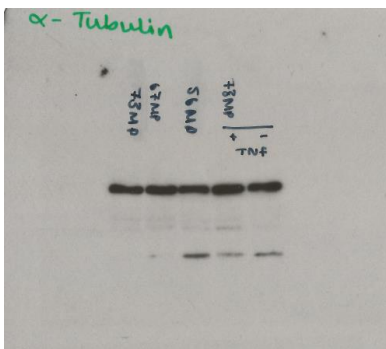

**Supplementary Figure 32. Uncropped western blots for Supplementary Figures 7a.** The relevant figures are indicated in the blot titles.



a) Supplement Fig 7b\_pSMAD1/5 (left panel) e) Supplement Fig 7b\_tSMAD1 (right panel)

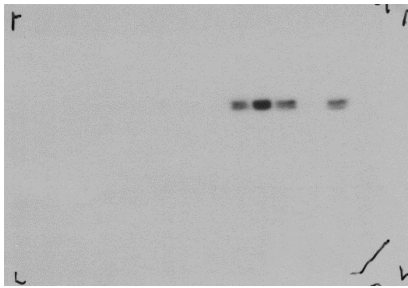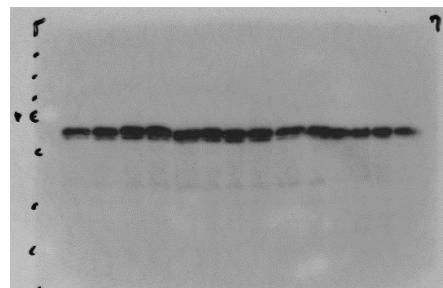

b) Supplement Fig 7b\_tSMAD1 (left panel) f) Supplement Fig 7b\_alpha tubulin (right panel)

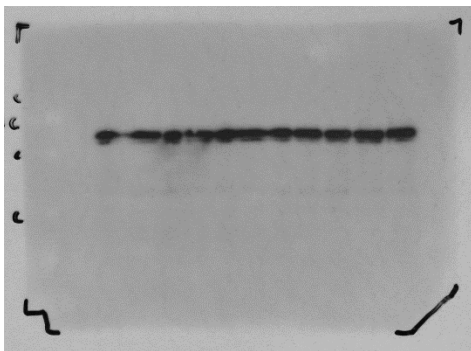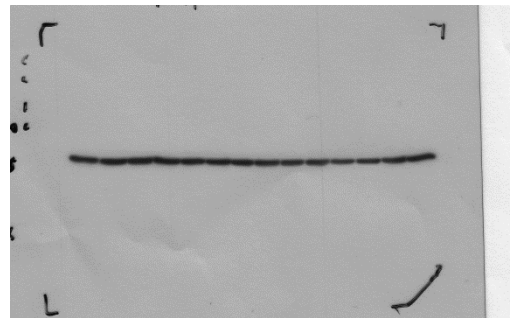

c) Supplement Fig 7b\_alpha tubulin (left panel) g) Supplement Fig 7c\_BMPR-II

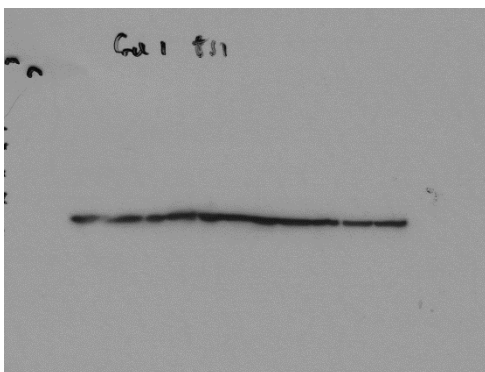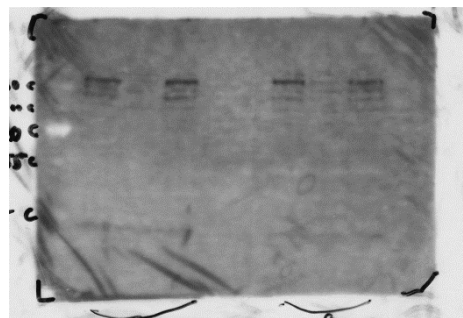

d) Supplement Fig 7b\_pSMAD1/5 (right panel) h) Supplement Fig 7c\_alpha tubulin

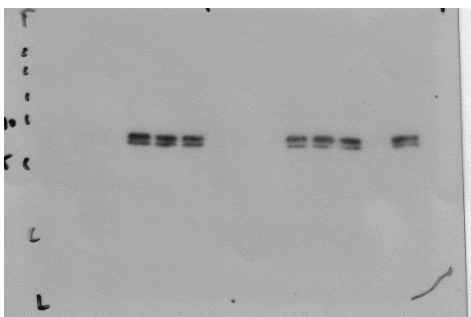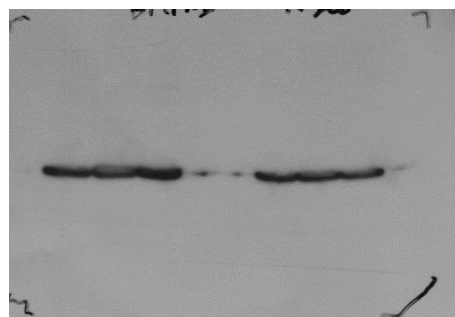

**Supplementary Figure 33. Uncropped western blots for Supplementary Figures 7b and 7c. The relevant figures are indicated in the blot titles.**

a) Supplement Fig 7d\_pSMAD1/5 (right panel) e) Supplement Fig 7d\_pSMAD1/5 (left panel)

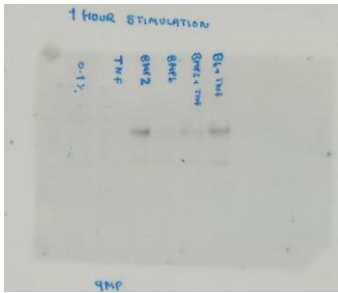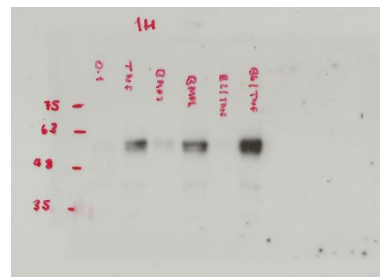

b) Supplement Fig 7d\_tSMAD1 (right panel) f) Supplement Fig 7d\_tSMAD1 (left panel)

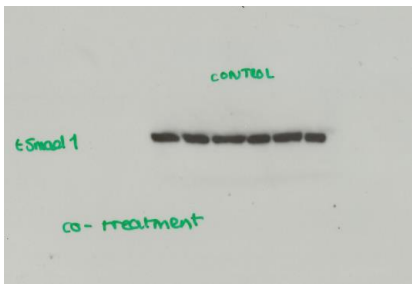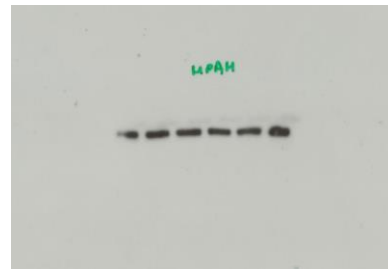

c) Supplement Fig 7d\_ID1 (right panel)

g) Supplement Fig 7d\_ID1 (left panel)

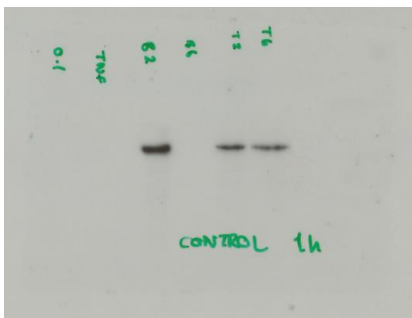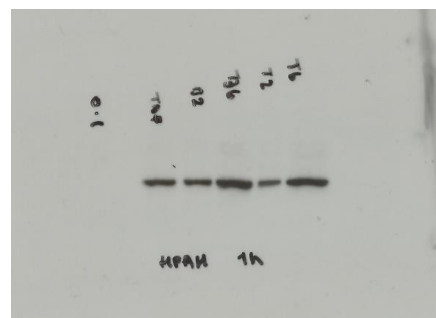

d) Supplement Fig 7d\_alpha tubulin (right panel)

h) Supplement Fig 7d\_alpha tubulin (left panel)

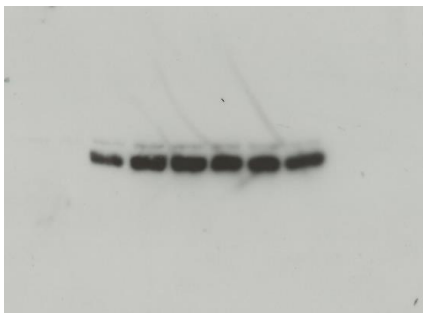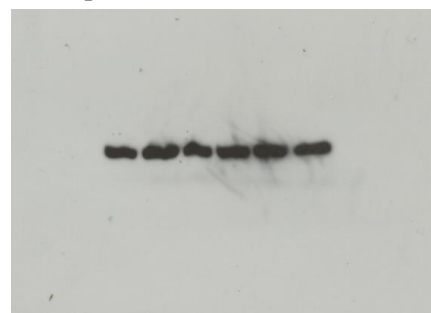

**Supplementary Figure 34. Uncropped western blots for Supplementary Figure 7d.** The relevant figures are indicated in the blot titles.

a) Supplement Fig 11a\_NOTCH1

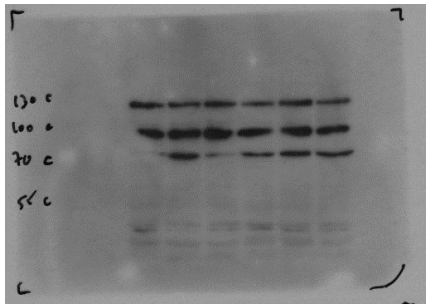

c) Supplement Fig 11a\_NOTCH3

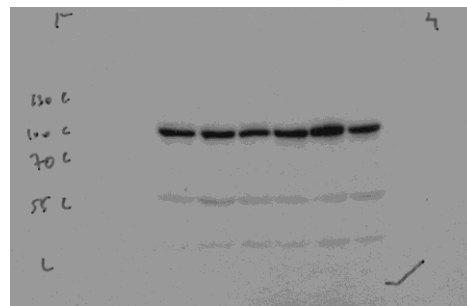

b) Supplement Fig 11a\_NOTCH2

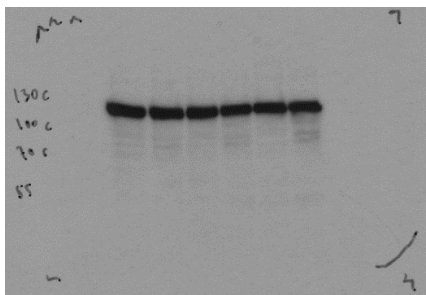

d) Supplement Fig 11a\_alpha tubulin

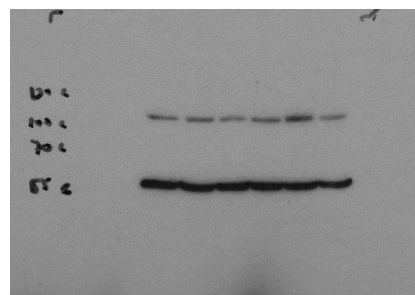

**Supplementary Figure 35. Uncropped western blots for Supplementary Figure 11a.** The relevant figures are indicated in the blot titles.

a) Supplement Fig 11c\_NOTCH1 (left panel)

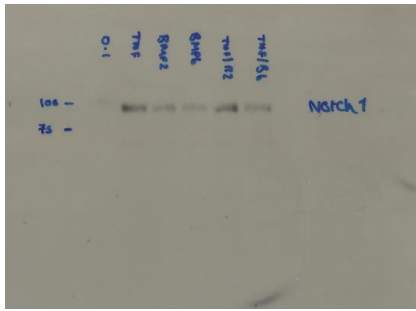

e) Supplement Fig 11c\_NOTCH1 (right panel)

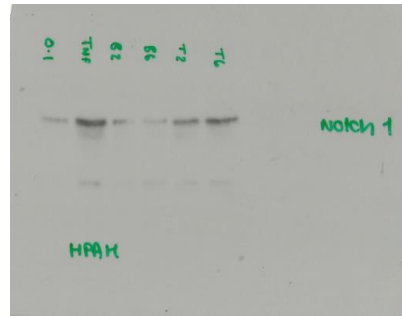

b) Supplement Fig 11c\_NOTCH2 (left panel)

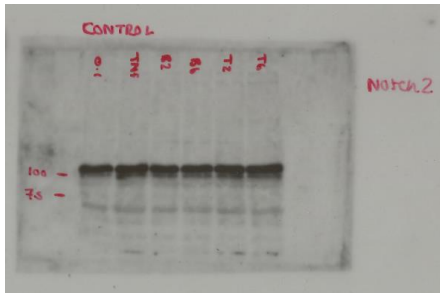

f) Supplement Fig 11c\_NOTCH2 (right panel)

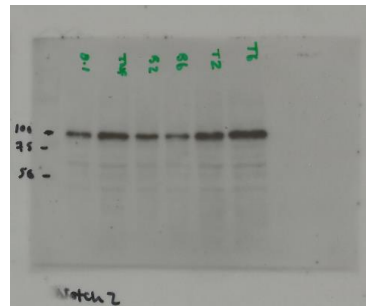

c) Supplement Fig 11c\_NOTCH3 (left panel)

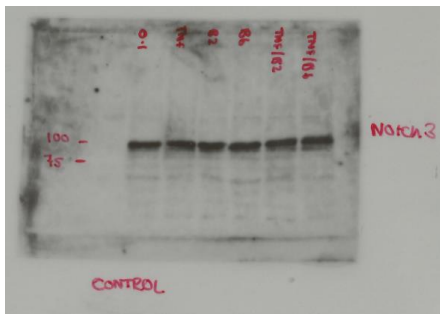

g) Supplement Fig 11c\_NOTCH3 (right panel)

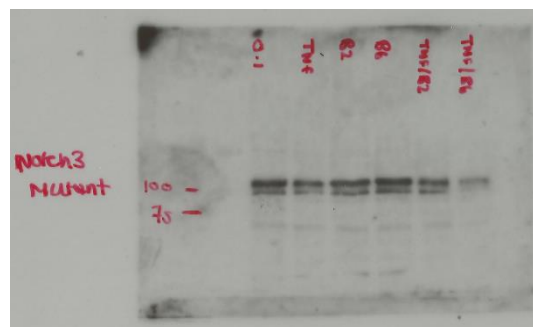

d) Supplement Fig 11c\_alpha tubulin (left panel)

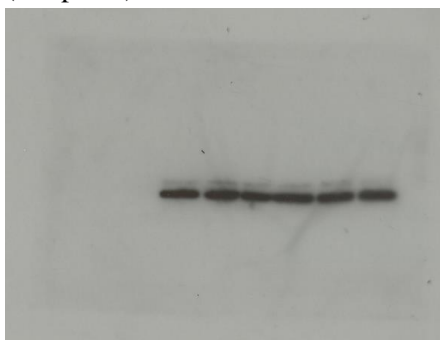

h) Supplement Fig 11c\_alpha tubulin (right panel)

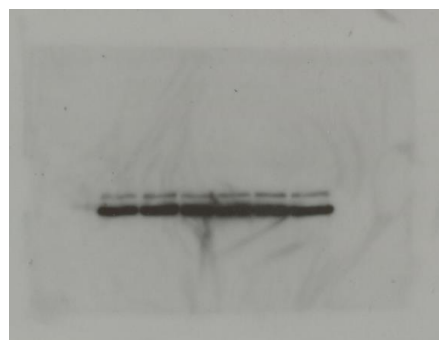

**Supplementary Figure 36. Uncropped western blots for Supplementary Figure 11c.** The relevant figures are indicated in the blot titles.

a) Supplement Fig 13g\_NOTCH2 panel)

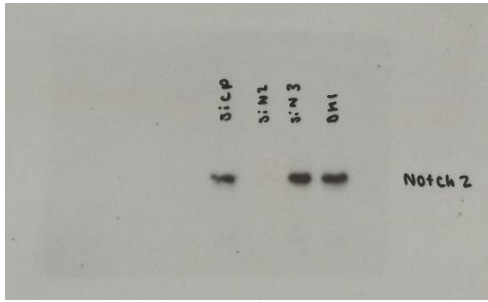

b) Supplement Fig 13g\_NOTCH3

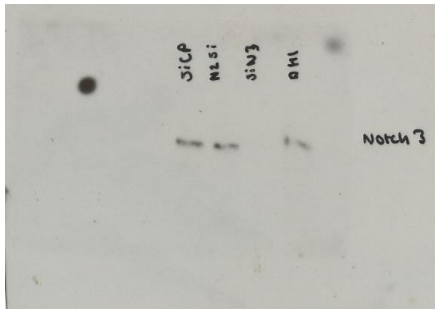

c) Supplement Fig 13g\_alpha tubulin

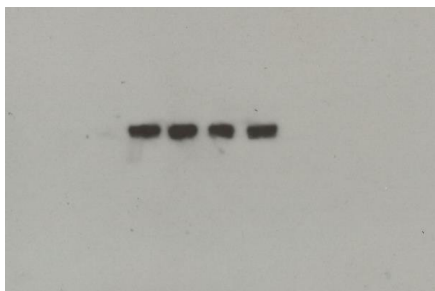

d) Supplement Fig 14d\_NOTCH1 (left panel)

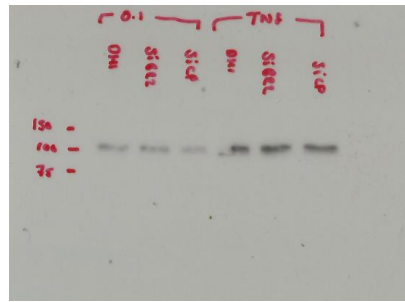

e) Supplement Fig 14d\_alpha tubulin (left panel)

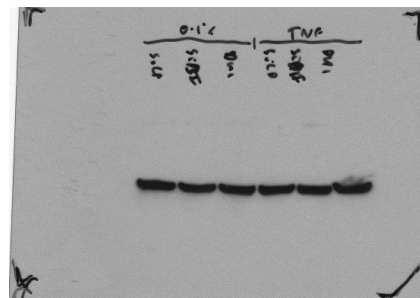

f) Supplement Fig 14d\_NOTCH1 (right panel)

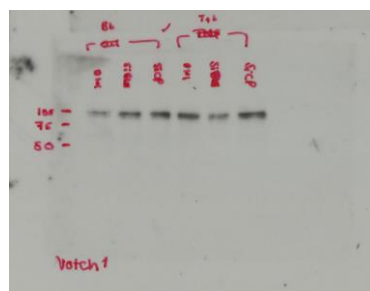

g) Supplement Fig 14d\_alpha tubulin (right panel)

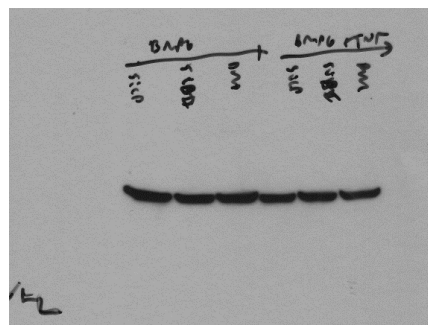

**Supplementary Figure 37. Uncropped western blots for Supplementary Figures 13g and 14d.**  
The relevant figures are indicated in the blot titles.

a) Supplement Fig 14e\_NOTCH1 (left panel)

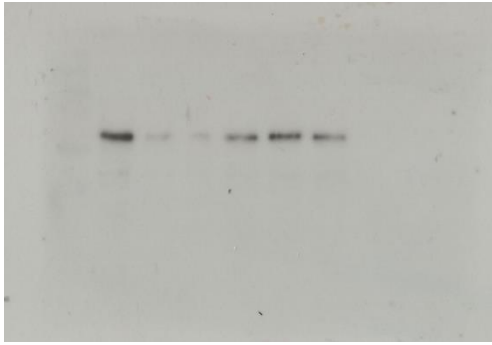

c) Supplement Fig 14e\_NOTCH1 (right panel)

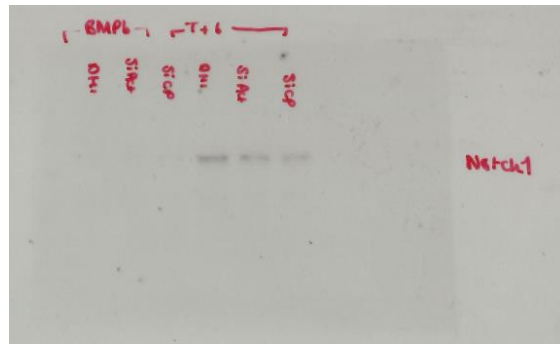

b) Supplement Fig 14e\_alpha tubulin (left panel)

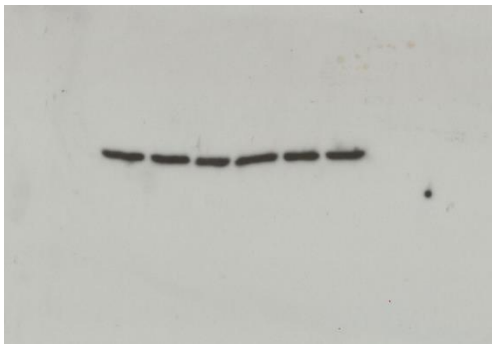

d) Supplement Fig 14e\_alpha tubulin (right panel)

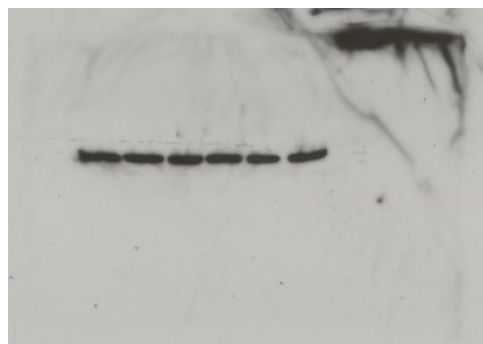

**Supplementary Figure 38. Uncropped western blots for Supplementary Figure 14e.** The relevant figures are indicated in the blot titles.

a) Supplement Fig 14f\_NOTCH2 (left panel)

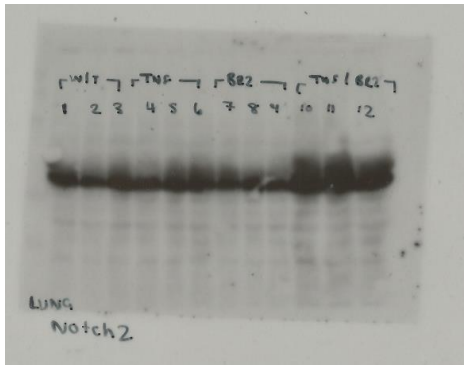

d) Supplement Fig 14f\_NOTCH2 (right panel)

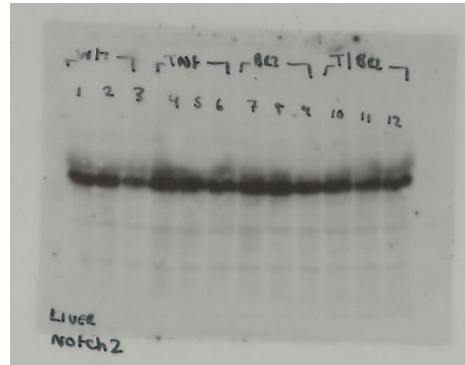

b) Supplement Fig 14f\_NOTCH3 (left panel)

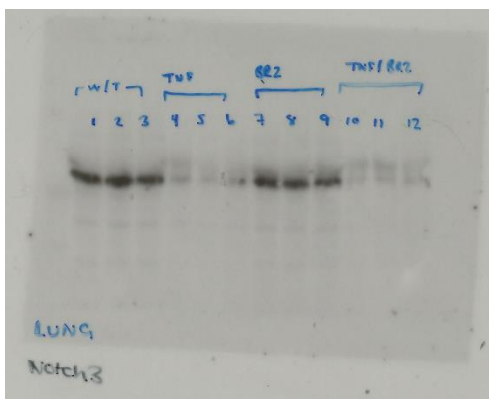

e) Supplement Fig 14f\_NOTCH3 (right panel)

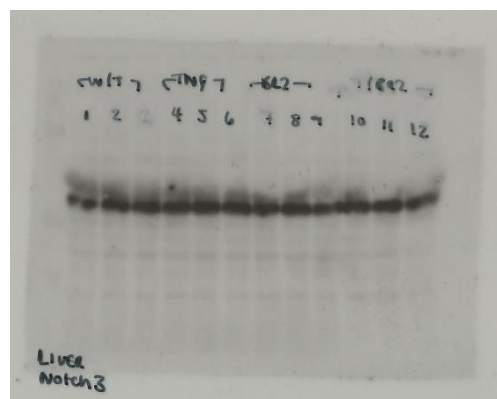

c) Supplement Fig 14f\_alpha tubulin (left panel)

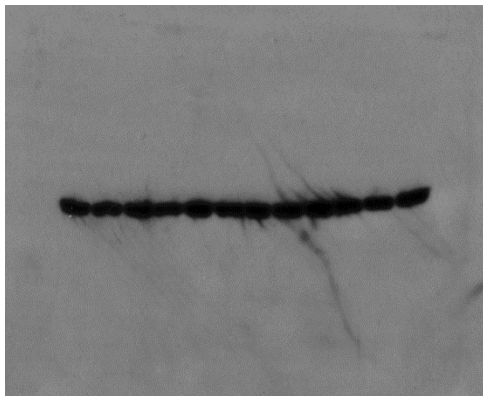

f) Supplement Fig 14f\_alpha tubulin (right panel)

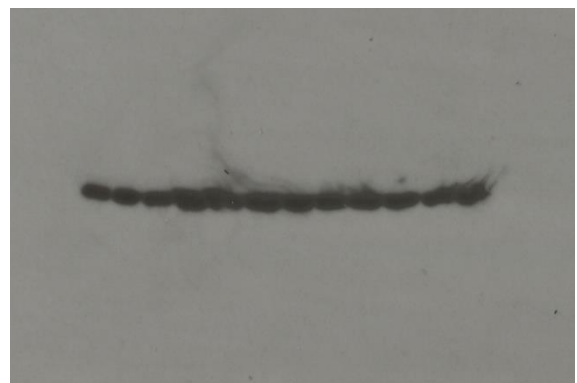

**Supplementary Figure 39. Uncropped western blots for Supplementary Figure 14f.** The relevant figures are indicated in the blot titles.

**Supplementary Table 1: Left ventricular function in the Sugén-hypoxia rat model**

|                                        | Sugén + Hypoxia - 11 weeks |              |               |
|----------------------------------------|----------------------------|--------------|---------------|
|                                        | Control                    | Vehicle      | Etanercept    |
| <b>n</b>                               | 6                          | 7            | 8             |
| <b>Heart rate (bpm)</b>                | 445.3 ± 22.4               | 425.5 ± 45.9 | 373.1 ± 68.4* |
| <b>LVESP (mmHg)</b>                    | 107.4 ± 10.7               | 104.5 ± 22.8 | 105.3 ± 14.5  |
| <b>LVEDP (mmHg)</b>                    | 21.59 ± 9.78               | 14.45 ± 8.36 | 17.18 ± 7.85  |
| <b>Stroke Volume (RVU)</b>             | 19.23 ± 4.30               | 22.38 ± 5.34 | 23.04 ± 8.75  |
| <b>Cardiac Output (RVU/min)</b>        | 8581 ± 2030                | 9450 ± 2360  | 8253 ± 2471   |
| <b>dP/dt max (mmHg s<sup>-1</sup>)</b> | 6835 ± 799                 | 6363 ± 1574  | 6470 ± 1084   |
| <b>Blood Pressure (mmHg)</b>           | 100.0 ± 3.69               | 101.0 ± 6.90 | 100.6 ± 10.0  |

+/- SEM, \**P*<0.05 relative to control

LVESP: Left Ventricular End-Systolic Pressure

LVEDP: Left Ventricular End-Diastolic Pressure

RVU: Relative volume units

**Supplementary Table 2: Pulmonary arterial smooth muscle cell clinical information**

| Subject ID           | Sex | Age | <i>BMPR2</i> Mutation | Clinical Details        |
|----------------------|-----|-----|-----------------------|-------------------------|
| <b>Control PSMCs</b> |     |     |                       |                         |
| 9MP                  | M   | 72  | -                     | Adenocarcinoma          |
| 32MP                 | F   | 58  | -                     | Emphysema               |
| 70MP                 | M   | 66  | -                     | Squamous cell carcinoma |
| <b>HPAH PSMCs</b>    |     |     |                       |                         |
| 56MP                 | M   | 58  | C347R                 | FPAH; transplant        |
| 67MP                 | M   | 22  | W9X                   | FPAH; transplant        |
| 73MP                 | F   | 30  | R899X                 | FPAH; transplant        |

**Supplementary Table 3. Mutagenesis primers for myc-tagged *BMPR-II* valine-alanine plasmids.**

| Mutation | Forward                                             | Reverse                                              |
|----------|-----------------------------------------------------|------------------------------------------------------|
| V158A    | AATAATCATTGCTTTGGCATCAGCC<br>TCTGTATTAGCTGTTTTGATAG | CTATCAAAAACAGCTAATACAGAGGCTGAT<br>GCCAAAGCAATGATTATT |
| V160A    | TGCTTTGGCATCAGTCTCTGCATTA<br>GCTGTTTTGATAGTTG       | CAACTATCAAAAACAGCTAATGCAGAGACT<br>GATGCCAAAGCA       |
| V163A    | CATCAGTCTCTGTATTAGCTGCTTTG<br>ATAGTTGCCTTATGCTT     | AAGCATAAGGCAACTATCAAAGCAGCTAA<br>TACAGAGACTGATG      |
| V166A    | GTCTCTGTATTAGCTGTTTTGATAGC<br>TGCCTTATGCTTTGGA      | TCCAAAGCATAAGGCCAGCTATCAAAAACAG<br>CTAATACAGAGAC     |



**Supplementary Table 4. Quantitative RT-PCR primers for human.**

| <b>Target</b> | <b>Forward</b>           | <b>Reverse</b>                |
|---------------|--------------------------|-------------------------------|
| <i>ACTB</i>   | GCACCACACCTTCTACAATGA    | GTCATCTTCTCGCGGTTGGC          |
| <i>ALK3</i>   | TTCGTATGACGGATCACTCG     | AGCCCTACATCATGGCTGAC          |
| <i>ADAM10</i> | TTCTGCTCCTCTCCTGGGCGG    | GCTCTTTTGGCACGCTGGTGT         |
| <i>ADAM12</i> | CACGGCAGAGGGGTGTGCAA     | TCCGGCAGCAAGAAGACACAGG        |
| <i>ADAM15</i> | GGCACTGAGGAGCAGCAGGC     | CGGCCTGGGACCAACTCCCT          |
| <i>ADAM17</i> | TAGCAGTGAGTGCCCGCCTCC    | CATAGGGCACACAGCGGCCAG         |
| <i>B2M</i>    | CTCGCGCTACTCTCTTTTCT     | CATTCTCTGCTGGATGACGTG         |
| <i>BMPR2</i>  | CAAATCTGTGAGCCCAACAGTCAA | GAGGAAGAATAATCTGGATAAGGACCAAT |
| <i>FYN</i>    | GGCGGGGAGAGGACCATGTGAG   | GAGGCAGGACTGGTCTTTTCCACG      |
| <i>HES1</i>   | GGAATCCCCCGTCTACCTCT     | TGAGCAAGTGCTGAGGGTTT          |
| <i>HEY1</i>   | GGCTCTAGGTTCCATGTCCC     | AGCAGATCCCTGCTTCTCAA          |
| <i>HEY2</i>   | GCCATACAGATGCCGACAGA     | CAGTTACCGAGCTGCCTTGA          |
| <i>ID1</i>    | GACGGCCGAGGCGGCATG       | GGGGAGACCCACAGAGCACG          |
| <i>NOTCH3</i> | CCTAGACCTGGTGGACAA       | ACACAGTCGTAGCGGTTG            |
| <i>MMP14</i>  | CGGACCATGTCTCCCGCCCC     | GTGACTGGGGTGAGCGCTGTG         |
| <i>MMP15</i>  | CTTGGCGTAGCGGCCGAAGA     | CTGGGCGGAACGCATGGTGG          |
| <i>MMP16</i>  | ACCTTCCACCGACTGACCCCA    | GGTACACCGCATCGGGGCTTC         |
| <i>MMP17</i>  | GACAAGGTGCGCGTCTGGCA     | CTGGGCCACCGCTCAAAGT           |
| <i>MMP24</i>  | TCGCTGGTTCTGGCGTCTGC     | GGGTACCCAGGCTCCACCGT          |
| <i>SRC</i>    | TCCACCGGGACCTTCGTGCA     | AATTTGGCACCTTGCCGCGC          |
| <i>YES</i>    | GCGGCCGGAGGACAGATTTGAT   | ACGGACATGGTGACACTGTAGTGGG     |

**Supplementary Table 5. Quantitative RT-PCR primers for mouse**

| <b>Target</b> | <b>Forward</b>       | <b>Reverse</b>       |
|---------------|----------------------|----------------------|
| <i>Bmpr2</i>  | AGATCTATCCTCTCCCTAAG | TTAGAATGGACTGCCCTGTC |
| <i>Notch1</i> | GTCGCAACTGTGAGAGTGA  | TCGCAGAAGGCTGTGTTGAT |
| <i>Notch2</i> | AGCAGACTGGATGAACCGTG | AGCTGGAAAGTCACGATGGG |
| <i>Notch3</i> | GACTGCTCACTGAACGTGGA | CACACCGGCTGTTGTTGAAG |

**Supplementary Table 6. Quantitative RT-PCR primers for rat**

| <b>Target</b> | <b>Forward</b>            | <b>Reverse</b>          |
|---------------|---------------------------|-------------------------|
| <i>Actb</i>   | CTGCCTGACGGTCAGGT         | TGGATGCCACAGGATTCCAT    |
| <i>Alk2</i>   | TCTGTGCTAATGATGATGGCTCTCC | TTCGCGATCCAGGAAGGATTTT  |
| <i>Acvr2a</i> | ACTGCTGCAGATGGACCTG       | AGCTCCAGTTCAGAGTCCC     |
| <i>Bmp6</i>   | AGCACAGAGACTCTGACCTATTTTG | CCACAGATTGCTAGTTGCTGTGA |
| <i>Hes1</i>   | CGACACCGACAAACAAA         | GAATGTCTGCCTTCTCCAGCTT  |
| <i>Hey1</i>   | AAGCTGAGATCTTGCAGATG      | GGCGGCGACAGTTTGGAG      |
| <i>Hey2</i>   | TGACATCCTCCATGTCCC        | ACTGATAACGGTGGGCTG      |
